# Supplementary material for: Comparative transcriptome analysis reveals key insights into male sterility in Salvia miltiorrhiza Bunge
Source: PeerJ. 2021 Apr 27;9:e11326. doi: 10.7717/peerj.11326 (PMC8086568; doi:10.7717/peerj.11326)
Supplement: Supplemental Information 1 [file peerj-09-11326-s001.xlsx]

## Sheet: Sheet1
Table S1 Primers used for gene expression analysis for qRT-PCR
Gene ID	Primer sequence	PCR product (bp)
SMil_00004290	F: GCTTCCCTTAATGCTGTGCC	89
	R: GCCTTCCTCCCTTTGCCA
SMil_00027050	F: AAGAATCGAAAACGTGACAAA	123
	R: GGAGAGAAGACAAGGAGAGCA
SMil_00008667	F: GTACAACTCGATGCACGCG	106
	R: TTCCAGGAAGGAGATCCTCTCT
SMil_00011521	F: TCATTTGGGAGTAAATTGATTGC	140
	R: CCCTTTGGCGTGGCCTT
SMil_00005944	F: CCTCTGGTTTAGTATCGCATTTTAG	98
	R: AGGAACTGTCGTCTCTTGTTGG
SMil_00019301	ATGTTCTTGTGGCTCCCGTTTGG	93
	GCCGAGGAGGATGGAGAGGTG
SMil_00000951	CAAGAGATGGCAGCAGCAGTACG	127
	CAGCAGCACGACGCCTCATTAG
SMil_00004880	GGTGGTATGTCGCTGTGGAACTC	119
	ATCTTCATCGCCGTTGGTACTTGG
SMil_00015887	CGGCTCTCCTTTAGGCGTTGC	115
	CAGCGTTCCAGTTCTTGGGATACC
SMil_00000278	TGTCGCCTTCCCTCAGTTCCC	80
	CGAGCCTGCCAATGAAGTCCTG
SMil_00007823	GGCTCACCCTCACCCTCTTCC	81
	CATGTGCTCATTTGGAGGCGTTTG
SMil_00003466	TGGCGATTTGGACCTTCTTGACTG	87
	TGCTCCCTTTGGTTCCTGACATTG
SMil_00026949
SMil_00001217	TGCTGTCGTTCTTCGTCGCTTATC	89
	CCCGTTCTCGCATACCTCAAAGC
SMil_00029050	TCCAGCCATCTTTCATCGGAATGC	131
	CATACTCGTGCCGCCGCTTAG
SMil_00016982	TTCCTGAAGCCGAGAAACAAGAGC	83
	TCCTGCTGCAACCTTCTTCACTTC
SMil_00003163	CTGCTGAAGGTGGTGACGAAGAC	101
	GTCGAAAGGAGGCTGCTCTTGAAG
SMil_00023235	GCGAACATAGACAAGCCAGACTCC	147
	TGGTTCCGCTGGGTGAAGAGG
SMil_00011892	CGTTGCGGTGAAGAGGCTGAC	105
	AGGGTGATGAGATTCGGGTGTCTG
SMil_00005152	ACGGCACTTGCTATGGCGAATC	90
	GTCCTGGTTCTCTTGCTGCTTCTC
SMil_00025076	GGATGAGGATGATGGCGTTGAGG	89
	CGAACCCGTGACCAATAGAACCC
SMil_00017238	CACGGTGGCGAAGGCATGTC	109
	AATCTCTCCCGACGACGCTCTC
SMil_00022477	GTAAGAGGAGAATGCGAGGCGTTC	104
	CCTACCATCTGCTTGCTTGCTACC
SmActin	F: AGGAACCACCGATCCAGACA	278
	R: GGTGCCCTGAGGTCCTGTT
