# Supplementary material for: Comparative transcriptome analysis reveals key insights into male sterility in Salvia miltiorrhiza Bunge
Source: PeerJ. 2021 Apr 27;9:e11326. doi: 10.7717/peerj.11326 (PMC8086568; doi:10.7717/peerj.11326)
Supplement: Supplemental Information 2 [file peerj-09-11326-s002.xlsx]

## Sheet: Sheet1
Table S2 The differentially expressed genes between SW-S vs SW-F
Gene ID	log2FoldChange (SW-S/SW-F)	pvalue	padj	BLAST matching accessiong No.	gene_description
novel.1015	-2.24801	9.29e-06	9.96e-05
novel.1027	-3.28713	2.31e-27	4.2e-25
novel.1036	2.7456	3.15e-05	0.000296071
novel.1045	-8.15775	1.48e-07	2.31e-06
novel.1048	-9.17258	1.89e-13	8.23e-12
novel.1057	8.1377	1.42e-10	3.86e-09
novel.1070	2.01442	1.26e-22	1.54e-20
novel.1081	6.16386	5.92e-29	1.17e-26
novel.1083	-3.30556	0.000262767	0.00192645
novel.1103	-6.48479	2.74e-05	0.000261733	Q0E2Y1.1	(6-4)DNA photolyase
novel.1115	2.00941	0.00565369	0.0264493
novel.113	-10.3808	1.6e-17	1.12e-15
novel.1135	-8.38748	8.68e-11	2.45e-09
novel.1136	-6.28187	0.000352952	0.00250178
novel.1179	-5.51888	0.00533043	0.02515
novel.1185	-7.58361	4.17e-08	7.27e-07
novel.119	-6.68609	1.26e-13	5.67e-12
novel.1204	-6.26515	8.77e-05	0.000738101
novel.1207	5.51058	2.74e-08	4.98e-07
novel.1219	4.86042	0.0102879	0.042745
novel.1231	5.96691	1.03e-05	0.000108542
novel.1232	-3.23019	0.00679837	0.0307192
novel.1248	-2.43887	8.81e-08	1.43e-06
novel.1249	-8.59614	1.67e-11	5.26e-10
novel.1250	-7.95095	4.81e-10	1.2e-08	PF05970	PIF1-like helicase
novel.1254	3.62955	1.69e-41	7.38e-39
novel.1263	-3.68164	0.00604002	0.0279609
novel.1281	-5.91521	1.98e-13	8.6e-12	PF04434	SWIM zinc finger
novel.1285	11.2977	3.08e-21	3.3e-19
novel.1286	-7.09306	3.4e-05	0.000316724	PF13976	GAG-pre-integrase domain
novel.1287	-6.93421	3.26e-06	3.87e-05	PF13976	GAG-pre-integrase domain
novel.1295	-5.7428	5.73e-56	5.41e-53	PF02902	Ulp1 protease family, C-terminal catalytic domain
novel.131	-9.4439	1.92e-14	9.62e-13
novel.1316	2.0661	1.04e-10	2.88e-09
novel.1351	5.66756	1.62e-25	2.52e-23
novel.1361	-2.32885	3.78e-20	3.71e-18
novel.1368	5.454	0.00229222	0.0123593
novel.1375	3.65553	3.51e-08	6.24e-07
novel.1396	2.42685	5.74e-09	1.19e-07
novel.1411	7.02932	9.18e-07	1.23e-05
novel.1415	3.74572	5.82e-11	1.68e-09
novel.1426	-2.73451	0.000217567	0.00163019
novel.1429	9.29382	3.66e-14	1.77e-12
novel.1430	-2.59126	0.000619953	0.00406931
novel.1490	2.04091	3.76e-11	1.12e-09
novel.1497	-2.8999	3.22e-11	9.7e-10	P92519.1	Uncharacterized mitochondrial protein AtMg00810
novel.1500	6.11578	9.57e-05	0.000797868
novel.1507	9.80872	7.3e-16	4.33e-14
novel.1512	5.61889	0.000686878	0.00444459
novel.1516	2.57301	4.19e-10	1.07e-08
novel.1518	4.91047	3.7e-22	4.36e-20
novel.1528	7.81532	5.37e-09	1.12e-07	PF4889	Cwf15/Cwc15 cell cycle control protein
novel.1533	7.9518	8.64e-10	2.07e-08
novel.1546	8.65117	4.48e-12	1.54e-10
novel.1548	-8.65497	5.61e-12	1.91e-10
novel.1570	-7.88034	1.12e-09	2.63e-08
novel.1574	2.35085	0.0023682	0.0127087
novel.1591	-4.48287	0.00536332	0.0252686
novel.162	10.2777	1.37e-17	9.7e-16
novel.1631	-6.72774	2.29e-06	2.81e-05
novel.1662	3.24525	2.55e-05	0.000245913
novel.1663	-4.24131	1.19e-18	9.69e-17	O24496.2	Hydroxyacylglutathione hydrolase cytoplasmic
novel.1676	-8.11347	1.97e-09	4.4e-08
novel.1678	-5.01587	0.00631517	0.0290105
novel.1683	-8.73623	3.22e-12	1.13e-10
novel.1708	-2.6711	3.84e-05	0.000353523
novel.1722	-3.46952	6.59e-15	3.5e-13
novel.1742	-3.21755	0.0100064	0.0418785
novel.1744	-7.86789	7.26e-08	1.2e-06
novel.1769	8.35654	7.2e-12	2.4e-10	PF665	Integrase core domain|PF13976
novel.1770	-5.43226	7.59e-05	0.00064904
novel.1779	3.50254	2.35e-05	0.000228825
novel.1781	-2.5447	9.11e-30	1.92e-27
novel.1783	-6.38216	1.35e-05	0.000139404
novel.179	-6.66296	0.000119738	0.00097101
novel.1793	-2.1102	6.28e-08	1.05e-06
novel.1805	-3.78435	0.000198934	0.00150678	P10978.1	Retrovirus-related Pol polyprotein from transposon TNT 1-94
novel.182	-7.43048	2.38e-08	4.38e-07
novel.1848	-8.08063	0.000149883	0.00117842
novel.185	2.18746	2.32e-39	8.93e-37
novel.190	-4.67598	7.28e-07	1e-05
novel.1920	-2.34747	3.03e-06	3.61e-05
novel.1926	-2.74493	6.94e-19	5.87e-17
novel.1931	-7.48255	5.4e-06	6.13e-05
novel.1965	4.42313	0.00644522	0.02946
novel.1981	-5.02555	0.0061225	0.0282674
novel.1984	7.76766	3.58e-09	7.69e-08
novel.200	-2.58694	0.000391428	0.00273216
novel.2022	2.41985	0.000202268	0.00152926
novel.2032	-7.88834	3.34e-09	7.2e-08
novel.2036	7.59297	1.75e-23	2.29e-21	Q5SVZ6.1	Zinc finger MYM-type protein 1
novel.2044	-7.01462	1.06e-07	1.71e-06
novel.2048	-2.58047	0.00180409	0.0100995
novel.2059	-2.4177	0.00683871	0.0308585
novel.2064	-5.40482	0.00471653	0.0227787
novel.2069	-9.11283	4.7e-10	1.18e-08
novel.2077	6.75983	1.86e-07	2.84e-06
novel.2079	4.99178	0.000235375	0.00174797
novel.2083	7.30249	3.01e-48	2.15e-45
novel.2100	3.12643	1.12e-09	2.62e-08
novel.2102	-3.14615	0.000118211	0.000959691
novel.2104	-5.26374	0.00404187	0.0200427
novel.2105	-5.6149	0.00158516	0.00904523
novel.2111	5.68008	0.00108734	0.00655606
novel.2112	3.61812	9.95e-17	6.43e-15
novel.2117	-4.77254	5.32e-22	6.2e-20
novel.2134	4.40975	1.01e-08	2.02e-07
novel.2137	-6.37555	1.18e-05	0.000122897
novel.2139	-4.04143	1.16e-14	5.94e-13
novel.2141	3.38174	1.17e-52	1.01e-49
novel.2142	-8.24897	8.11e-34	2.45e-31
novel.2143	-7.89947	1.28e-09	2.97e-08
novel.2159	7.80515	2.82e-09	6.2e-08
novel.2173	-5.71235	0.000794378	0.00502031
novel.2176	-6.51233	7.82e-07	1.07e-05
novel.2178	8.71998	2.19e-12	7.96e-11
novel.2184	-8.74588	2.02e-08	3.77e-07
novel.2189	2.16727	1.52e-06	1.96e-05
novel.2196	-5.59733	6.95e-05	0.000599327
novel.2243	-7.6504	7.26e-09	1.49e-07	P10978.1	Retrovirus-related Pol polyprotein from transposon TNT 1-94
novel.2257	4.80127	0.000186585	0.00142356
novel.227	-2.23719	0.00106844	0.00644745
novel.2270	-6.76422	1.42e-06	1.84e-05
novel.2278	-7.38824	3.81e-06	4.47e-05
novel.2318	-2.74519	2.53e-17	1.75e-15
novel.2324	4.11787	0.0047217	0.0227961
novel.233	5.65425	5.48e-05	0.000484004
novel.2335	3.28926	0.00149827	0.00861354
novel.2414	-6.95603	3.45e-06	4.08e-05
novel.2430	-6.76303	5.04e-05	0.000450604
novel.2436	6.18127	5.93e-05	0.000519756
novel.2447	-6.558	8.55e-06	9.24e-05
novel.2455	-2.5695	5.84e-08	9.85e-07	Q9SZL8.1	Protein FAR1-RELATED SEQUENCE 5
novel.2459	-2.64209	4.48e-05	0.000406042
novel.2496	7.73147	3.08e-09	6.72e-08
novel.2503	5.52289	0.00568338	0.0265585
novel.2509	5.02248	8.3e-17	5.47e-15
novel.2513	-6.13931	4.17e-07	5.98e-06
novel.2514	3.71392	6.39e-18	4.71e-16
novel.2521	-3.32606	1.56e-19	1.41e-17
novel.2523	8.37059	2.45e-11	7.51e-10
novel.2524	-2.00974	0.000203912	0.00154
novel.2525	-6.04714	0.000122016	0.000987564
novel.2538	-11.3896	1.56e-21	1.75e-19
novel.2543	4.20045	7.34e-20	7.04e-18
novel.2560	-2.68935	0.000758934	0.00483389
novel.2563	4.42922	0.00642964	0.0294072
novel.2579	-4.09555	6.63e-09	1.36e-07
novel.2588	-2.92304	7.76e-05	0.000661705
novel.2645	-5.45436	3.13e-08	5.62e-07	PF14372	Domain of unknown function (DUF4413)
novel.265	-3.59461	2.54e-07	3.81e-06
novel.2654	-5.39412	1.32e-11	4.27e-10
novel.2658	-10.1666	3.54e-17	2.42e-15
novel.2684	7.35021	3.45e-08	6.14e-07
novel.2687	7.0711	2.03e-07	3.08e-06
novel.27	6.56056	5.16e-06	5.87e-05
novel.2708	-6.41234	0.0028887	0.0150863
novel.2727	5.20304	1.35e-24	1.9e-22
novel.2746	-5.23647	6.63e-23	8.29e-21
novel.2754	-4.00161	0.00102381	0.00621656
novel.2763	-2.75711	0.00112808	0.00676826
novel.2770	2.38799	3.4e-25	5.18e-23
novel.2789	-4.7519	0.00240091	0.0128695
novel.2792	-6.94671	1.84e-05	0.000183834
novel.2797	-6.69835	9.48e-06	0.000101412
novel.2828	8.17201	2.05e-10	5.46e-09
novel.2838	-5.80652	0.000236557	0.00175496
novel.2839	7.01606	5.84e-08	9.85e-07
novel.285	-6.90166	6.45e-08	1.08e-06
novel.2875	-5.39779	0.00714447	0.0319828
novel.2893	-2.26065	0.00337555	0.0171932
novel.2902	-2.3876	0.0072683	0.0323925
novel.291	-2.20826	1.07e-12	4.13e-11	Q42662.2	5-methyltetrahydropteroyltriglutamate--homocysteine methyltransferase
novel.2914	5.04079	0.0105365	0.043617
novel.2933	-4.79928	1.32e-05	0.000136138	PF13976	GAG-pre-integrase domain
novel.2938	2.37118	3.75e-07	5.45e-06
novel.2945	-5.37432	0.00182255	0.0101853
novel.2950	-6.5679	1.02e-05	0.00010807
novel.2954	-7.63756	3.19e-08	5.72e-07
novel.2961	4.22638	0.0110461	0.0453415
novel.2981	2.1199	2.52e-07	3.78e-06
novel.2986	-6.46235	8.48e-06	9.18e-05
novel.2987	-6.24233	6.91e-05	0.000596412
novel.2997	3.28198	0.00185666	0.0103522
novel.3001	4.96877	3.06e-11	9.25e-10
novel.3017	4.22476	0.0123751	0.0498188
novel.3019	-10.1923	2.92e-17	2.01e-15
novel.3029	3.89834	5.82e-06	6.56e-05
novel.3042	2.76682	7.09e-06	7.81e-05
novel.3048	-6.073	0.000125961	0.00101501
novel.3049	-5.83235	0.00263804	0.0139919
novel.3053	-7.29499	6.02e-08	1.01e-06
novel.3060	4.00247	2.2e-05	0.000215655	P03010.1	Putative AC9 transposase
novel.3065	5.19146	0.00423647	0.0208175
novel.3075	5.51274	0.0014656	0.0084581
novel.3096	-4.88323	1.07e-05	0.000112781
novel.3106	-3.55168	1.01e-05	0.000107121
novel.3115	3.16796	0.000727138	0.00465875
novel.3123	4.70962	0.00299936	0.0155753
novel.3138	-7.37144	4.1e-08	7.17e-07	P08770.2	Putative AC transposase
novel.3139	2.7515	8.25e-07	1.12e-05
novel.3144	-4.28692	0.000447802	0.00307648
novel.3151	-3.44424	1.22e-08	2.39e-07
novel.3156	-2.088	1.71e-07	2.64e-06
novel.3157	4.82676	1.68e-11	5.29e-10
novel.3158	2.35254	9.64e-26	1.52e-23
novel.3160	-2.55982	2.44e-05	0.000236382
novel.3172	-6.01787	0.0001078	0.000883498
novel.3190	-4.1319	0.000694434	0.00448082
novel.3220	-5.55206	2.24e-17	1.56e-15
novel.3228	-9.05634	1.58e-13	6.97e-12
novel.3237	-7.37976	1.12e-05	0.000117373
novel.3249	-9.6149	3.05e-15	1.69e-13
novel.3254	-6.69999	0.000420471	0.00291057
novel.3290	2.11025	0.000694468	0.00448082
novel.3312	-5.93314	0.00854704	0.0368295
novel.3326	-6.03879	2.47e-13	1.04e-11
novel.3329	-6.08635	0.000142933	0.0011309
novel.3359	-3.01374	1.1e-05	0.00011524
novel.3370	8.92173	5.79e-13	2.31e-11
novel.3373	-5.56891	0.00112331	0.00674378
novel.3387	6.27599	2.73e-47	1.77e-44
novel.343	10.8612	1.38e-19	1.25e-17
novel.3435	5.95709	0.000222213	0.00166118
novel.3437	-5.53142	0.00145118	0.00839526
novel.3441	-6.70825	1.9e-06	2.37e-05
novel.3444	-6.99599	5.81e-07	8.1e-06
novel.3451	-7.29204	1.21e-08	2.37e-07
novel.348	2.10952	0.00206088	0.0112951
novel.3505	2.36651	1.83e-09	4.12e-08
novel.3510	-3.45514	8.97e-10	2.14e-08
novel.3526	9.41733	1.04e-14	5.42e-13
novel.3536	3.9368	1.92e-15	1.08e-13
novel.3537	7.0949	2.31e-07	3.49e-06
novel.3539	-9.6695	1.56e-15	8.85e-14
novel.3544	-8.60742	5.89e-12	1.99e-10
novel.3547	7.47483	1.96e-08	3.69e-07
novel.3549	8.63751	1.42e-12	5.35e-11
novel.3557	5.94208	0.000286435	0.00207867
novel.3606	2.33882	2.03e-13	8.8e-12	Q0WQM8.1	F-box protein At1g53790
novel.3614	-3.6442	8.1e-31	1.87e-28	Q8VZC0.1	UDP-glucuronic acid decarboxylase 1
novel.3620	-4.2152	1.3e-06	1.7e-05
novel.3625	6.54435	7.32e-07	1e-05
novel.3631	6.13774	0.000992443	0.00604744
novel.3646	-8.67907	1.52e-12	5.7e-11
novel.3648	-7.55349	4.28e-06	4.96e-05
novel.366	5.56027	0.000904913	0.00560747
novel.3670	-6.09539	0.000162348	0.00126283
novel.368	-6.84759	7.93e-07	1.08e-05
novel.3688	5.65917	5.56e-05	0.000490531
novel.3691	-2.27096	4.64e-10	1.17e-08
novel.3696	-7.13491	6.92e-125	5.07e-121
novel.3702	-7.32682	6.18e-06	6.93e-05
novel.3745	5.50302	0.00120798	0.00717264
novel.3752	-5.01834	0.00959743	0.0405322
novel.376	-2.31638	0.00197295	0.0108853
novel.3767	5.99396	0.000235609	0.00174926
novel.3769	7.18505	9.01e-08	1.46e-06
novel.3775	5.19167	3.36e-07	4.93e-06
novel.3781	-7.42734	3.22e-05	0.000301831
novel.3782	7.59564	2.27e-44	1.15e-41
novel.3784	-3.58668	2.35e-46	1.4e-43
novel.379	5.86449	0.000357942	0.0025298
novel.3795	-7.11665	2.89e-07	4.28e-06
novel.3801	-6.67608	3.48e-06	4.12e-05
novel.3805	-8.85847	1.85e-11	5.75e-10
novel.3809	6.57112	5.23e-07	7.37e-06
novel.382	-2.90169	1.62e-12	6.05e-11
novel.383	6.96397	1.48e-10	4e-09
novel.3844	2.13255	1.81e-11	5.64e-10
novel.3846	2.88826	1.09e-15	6.31e-14
novel.3851	-12.6851	2.59e-26	4.25e-24
novel.3854	-4.37501	6.21e-12	2.09e-10
novel.3871	6.44899	1.02e-05	0.000108246
novel.3908	-2.7106	0.000954844	0.00586103
novel.3926	8.68864	3.5e-12	1.23e-10	PF5699	hAT family C-terminal dimerisation region
novel.3950	-4.1172	2.05e-16	1.27e-14
novel.3971	4.72984	0.000165847	0.00128578
novel.3974	-8.9553	6.57e-05	0.000569891
novel.3980	-5.38332	0.000775844	0.00491986
novel.3985	-5.59125	0.000896015	0.00556412
novel.3987	-5.21878	1.54e-09	3.51e-08
novel.3995	-6.16571	4.87e-05	0.000436902
novel.4000	-8.44623	1.49e-11	4.73e-10
novel.4002	3.08188	1.3e-11	4.19e-10
novel.4006	-10.043	9.25e-17	6.01e-15	P0CT34.1	Transposon Tf2-1 polyprotein
novel.4008	-2.71839	7.97e-17	5.27e-15	Q9LIR8.1	F-box/kelch-repeat protein At3g23880
novel.4021	-6.16168	0.000522189	0.00351008
novel.4024	2.19073	6.74e-05	0.000583809	Q9LIR8.1	F-box/kelch-repeat protein At3g23880
novel.4025	-5.78432	4.75e-28	8.85e-26
novel.4029	5.45013	0.0017824	0.00998766
novel.4032	-6.66475	1.72e-09	3.9e-08
novel.4067	-5.95195	8.54e-17	5.6e-15
novel.4074	-2.65454	0.00388587	0.0193909	P98205.1	Phospholipid-transporting ATPase 2; Short=AtALA2
novel.4092	8.82933	2.66e-17	1.84e-15
novel.412	-11.2526	6.4e-21	6.72e-19
novel.4126	7.91996	7.47e-10	1.81e-08
novel.4128	5.63297	5.7e-12	1.94e-10
novel.413	5.32094	0.00252498	0.0134679
novel.4138	9.46588	3.49e-15	1.92e-13
novel.4140	-3.59568	5.65e-07	7.9e-06
novel.4152	-5.92594	0.000223642	0.00166888
novel.4157	5.39739	5.61e-40	2.28e-37
novel.4173	-3.97673	3.24e-05	0.000303281
novel.4177	-7.89653	1.53e-06	1.97e-05
novel.4184	-7.52342	2.45e-08	4.49e-07
novel.4188	-6.57141	5.13e-05	0.000457231
novel.4192	-5.3069	6.37e-06	7.11e-05
novel.420	-3.30234	5.51e-06	6.24e-05	Q02921.1	Early nodulin-93
novel.4202	-7.09869	1.51e-07	2.35e-06
novel.4210	5.9949	0.000208597	0.00156975
novel.4219	-6.31124	0.00347538	0.0176158
novel.4220	13.4883	7.19e-30	1.55e-27	P10978.1	Retrovirus-related Pol polyprotein from transposon TNT 1-94
novel.4225	6.56838	7.7e-06	8.43e-05
novel.423	5.56102	0.000788833	0.0049885
novel.425	-9.30029	2.79e-14	1.37e-12
novel.4262	-5.01016	1.75e-06	2.21e-05
novel.4293	-3.49911	9.99e-06	0.000106128
novel.4312	5.44547	0.00150985	0.00867127
novel.4317	3.84701	9.6e-05	0.000800265
novel.4328	3.19944	7.33e-61	8.94e-58
novel.4333	-7.68295	3.28e-09	7.1e-08
novel.4335	-2.76025	9.32e-12	3.06e-10	Q9C800.1	Putative F-box protein At1g33530
novel.4346	3.61244	5.76e-15	3.07e-13
novel.4350	-2.90559	2.72e-05	0.000260751
novel.4352	7.73518	2.67e-09	5.89e-08
novel.4353	-7.3778	3.85e-08	6.77e-07
novel.4380	-2.08814	2.39e-21	2.61e-19	Q05431.2	L-ascorbate peroxidase 1, cytosolic; Short=AP; Short=AtAPx01
novel.4383	6.65619	2.65e-07	3.95e-06
novel.4390	3.95633	0.00732372	0.0325799
novel.4392	6.27476	2.47e-06	3e-05
novel.4394	8.78824	2.54e-12	9.13e-11
novel.4434	-2.4124	0.00221638	0.012028
novel.4435	4.4316	0.00836541	0.0361801
novel.4437	-9.58392	1.44e-15	8.21e-14
novel.4450	-5.75135	0.000521465	0.00350602
novel.4453	-2.51884	1.21e-15	6.92e-14
novel.4485	-7.87858	1.32e-09	3.05e-08
novel.4487	-7.1715	2.38e-07	3.59e-06
novel.4495	3.74262	7.28e-07	1e-05
novel.4508	-8.28626	1.7e-11	5.33e-10
novel.451	-5.27274	0.00862016	0.0370706
novel.4530	-6.29498	4.66e-05	0.000419994
novel.4546	-6.92416	1.71e-06	2.17e-05
novel.464	-6.25997	5.8e-05	0.000510078
novel.488	-7.2671	1.43e-07	2.24e-06
novel.498	-7.6483	3.99e-09	8.5e-08
novel.504	-6.01422	0.00683369	0.0308474
novel.510	-4.66391	0.00422739	0.0207833
novel.516	-3.46247	0.000529459	0.00355243
novel.521	-7.69271	5.45e-06	6.18e-05
novel.582	-9.28155	0.000659253	0.00429336
novel.599	-9.1773	2.87e-13	1.2e-11
novel.600	-6.50784	3.33e-24	4.62e-22
novel.627	7.08956	2.07e-07	3.14e-06
novel.644	-2.47751	1.09e-13	4.95e-12	Q9LMA1.1	Probable flavin-containing monooxygenase 1
novel.656	2.94651	1.89e-32	4.98e-30
novel.669	-6.18892	9.17e-05	0.000767579
novel.671	-9.09418	1.82e-13	7.98e-12	F4IVI0.1	Mitotic checkpoint serine/threonine-protein kinase BUB1; Short=AtBUB1
novel.684	-2.37695	0.0115382	0.0470187
novel.69	-2.87868	2.64e-05	0.000253381
novel.704	-3.19761	1.77e-05	0.000177196
novel.707	5.49004	3.7e-06	4.36e-05
novel.712	6.03391	8.33e-05	0.000705216
novel.718	3.27907	0.00011656	0.000948652
novel.745	2.62511	1.46e-05	0.000149412
novel.760	-3.80784	4.5e-09	9.51e-08
novel.761	-2.03391	2.55e-05	0.000245409
novel.762	-3.54164	0.00958537	0.0404929
novel.771	-8.21138	3.69e-11	1.1e-09	P93263.1	5-methyltetrahydropteroyltriglutamate--homocysteine methyltransferase
novel.788	-9.04722	4.09e-13	1.66e-11
novel.793	-11.1935	1.05e-20	1.08e-18
novel.795	-8.74208	2.1e-12	7.65e-11
novel.803	-4.90261	0.000129858	0.00104239
novel.814	-5.79547	0.0113842	0.0464817
novel.82	-3.84196	2.15e-12	7.84e-11	O04084.2	Serine carboxypeptidase-like 31
novel.824	6.99561	6.3e-07	8.75e-06
novel.840	-5.2262	0.00087538	0.00545681
novel.844	5.32007	0.00230688	0.0124201	P92520.1	Uncharacterized mitochondrial protein AtMg00820
novel.845	7.88647	1.15e-09	2.69e-08
novel.847	-6.43402	0.000101025	0.000835702
novel.879	7.40198	1.41e-21	1.6e-19
novel.892	-5.23514	0.0034167	0.0173726
novel.896	-7.16301	2.38e-06	2.9e-05
novel.897	2.28184	0.000857916	0.00536692
novel.911	5.99225	9.38e-05	0.000783279
novel.936	-2.97865	1.09e-17	7.83e-16	PF13976	GAG-pre-integrase domain|PF00665
novel.949	-8.33856	4.91e-11	1.44e-09
novel.971	-5.28122	0.00817733	0.0355239
novel.989	-7.38024	6.7e-08	1.11e-06
novel.990	10.4135	4.26e-18	3.22e-16
novel.991	-6.86396	2.32e-06	2.84e-05
novel.992	-3.46705	1.13e-14	5.79e-13
novel.993	-2.92045	2.97e-12	1.05e-10	PF646	F-box domain
novel.994	8.16001	7.41e-09	1.51e-07	Q9SJY5.1	Mitochondrial uncoupling protein 5; Short=AtPUMP5
novel.995	-8.65788	8.76e-05	0.000737788	O49691.1	RING-H2 finger protein ATL29
novel.996	3.01653	6.56e-26	1.05e-23	PF5056	Protein of unknown function (DUF674)
novel.997	-2.97098	0.0001233	0.000996855	PF4937	Protein of unknown function (DUF 659)|PF05699
novel.998	-5.81444	0.000259437	0.00190442
novel.999	7.00121	1.77e-10	4.73e-09	Q9LJU0.1	COBRA-like protein 10
novel.1000	3.30258	5.18e-29	1.03e-26	PF2902	Ulp1 protease family, C-terminal catalytic domain
novel.1001	-4.79041	2.01e-08	3.77e-07
novel.1003	-2.71402	0.000305586	0.00220231
novel.1005	-7.84386	1.11e-09	2.6e-08
SMil_00000001	-9.34105	8.03e-06	8.75e-05
SMil_00000033	3.08374	4.02e-06	4.7e-05	O49621.1	MLO-like protein 1; Short=AtMlo1
SMil_00000039	-6.09781	0.00591218	0.0274916
SMil_00000041	-4.48763	4.46e-12	1.54e-10	O80585.2	Methylenetetrahydrofolate reductase 2; Short=AtMTHFR2
SMil_00000047	2.52477	0.000297439	0.00214783
SMil_00000058	-2.27922	3.24e-05	0.000303431	Q67XQ0.1	DUF21 domain-containing protein At4g14240
SMil_00000087	-2.32963	0.000349002	0.00247618
SMil_00000159	3.83206	2.57e-12	9.22e-11	O49118.3	Histone H2B
SMil_00000160	-2.15099	1.18e-11	3.83e-10	O23249.1	Cyclin-dependent kinases regulatory subunit 1
SMil_00000173	-2.47056	0.00036992	0.00260001	Q94AM1.1	Organellar oligopeptidase A, chloroplastic/mitochondrial
SMil_00000175	-3.11272	0.000966091	0.00591271	Q9FFC6.3	GDSL esterase/lipase At5g22810
SMil_00000188	5.48557	0.000207024	0.00155998	Q9FYE5.1	Probable sugar phosphate/phosphate translocator At5g04160
SMil_00000191	-2.558	8.97e-10	2.14e-08
SMil_00000216	5.24745	0.00545878	0.025677
SMil_00000227	4.59453	2.94e-06	3.51e-05	Q05AS3.1	Spastin
SMil_00000231	5.09593	5.86e-07	8.17e-06	PF12049	Protein of unknown function (DUF3531)
SMil_00000265	-8.51312	9.97e-12	3.26e-10	Q9LDA9.1	CRS2-associated factor 2, chloroplastic
SMil_00000288	-5.99122	0.00120476	0.00715934	O22611.1	Dormancy-associated protein 1; Short=PsDRM1
SMil_00000294	-3.12976	0.000162438	0.00126304
SMil_00000297	9.15262	9.45e-14	4.32e-12
SMil_00000326	-2.97092	8.88e-11	2.5e-09	Q9S9N9.1	Cinnamoyl-CoA reductase 1; Short=AtCCR1
SMil_00000341	2.96976	2.38e-06	2.9e-05	PF9810	Exonuclease V - a 5' deoxyribonuclease
SMil_00000343	7.86768	2.14e-10	5.65e-09
SMil_00000362	-5.56797	0.0021032	0.0114969
SMil_00000371	2.25608	1.84e-06	2.31e-05	F4IB81.1	LysM domain receptor-like kinase 3; Short=LysM-containing receptor-like kinase 3
SMil_00000380	-5.64678	0.000357688	0.00252861	Q9LT24.1	BTB/POZ domain-containing protein At3g19850
SMil_00000383	-2.62714	0.000360033	0.00254212	PF6814	Lung seven transmembrane receptor
SMil_00000583	-7.64929	7.2e-10	1.75e-08	P15722.1	Probable pectate lyase P59
SMil_00000598	8.32922	5.28e-11	1.54e-09
SMil_00000601	2.48317	0.000663896	0.00431879	Q39264.1	Zinc finger protein 5
SMil_00000629	-4.82575	0.000115786	0.000943021	Q8H129.1	Purple acid phosphatase 3
SMil_00000633	-2.73949	8.58e-07	1.16e-05	P19173.3	Cytochrome c oxidase subunit 5C
SMil_00000643	9.05007	4.03e-18	3.07e-16	Q9SS94.2	Cell division control protein 48 homolog C; Short=AtCDC48c
SMil_00000670	-2.2514	0.00333966	0.017043	Q9SCX8.1	Purple acid phosphatase 17
SMil_00000674	-6.24727	2.5e-05	0.000241147
SMil_00000695	-2.56942	5.69e-18	4.25e-16
SMil_00000698	-3.10588	0.00199509	0.010986
SMil_00000702	2.24694	0.000866489	0.00541402	Q8L5T5.2	LOB domain-containing protein 15
SMil_00000723	-3.84096	3.92e-06	4.59e-05	B3H672.1	Pentatricopeptide repeat-containing protein At4g17616
SMil_00000746	-4.37861	1.07e-33	3.2e-31
SMil_00000747	-7.58463	4.08e-06	4.77e-05	A0MDQ1.2	Ubiquitin-related modifier 1 homolog 1
SMil_00000748	-5.24109	9.08e-05	0.000760623	Q9M2Z5.1	F-box/LRR-repeat protein At3g48880
SMil_00000755	8.80551	1.77e-12	6.58e-11	Q01111.1	Ras-related protein YPT3
SMil_00000786	-6.47004	7.91e-06	8.64e-05	Q9SL56.2	Putative glycerol-3-phosphate transporter 5; Short=G-3-P transporter 5
SMil_00000792	-4.4492	1.31e-18	1.05e-16	Q9LVN0.1	Glycerophosphodiester phosphodiesterase GDPDL7
SMil_00000841	-3.43587	0.00479022	0.0230698	PF6880	Protein of unknown function (DUF1262)
SMil_00000863	2.67983	0.000121599	0.000984463	P16064.1	Subtilisin inhibitor 1
SMil_00000881	-6.56153	6.81e-06	7.54e-05
SMil_00000916	4.78241	6.33e-30	1.37e-27
SMil_00000951	-5.70827	1.49e-09	3.41e-08	Q4TU14.1	E3 ubiquitin-protein ligase RHF1A
SMil_00001055	6.50815	6.13e-06	6.87e-05
SMil_00001068	-3.2495	1.7e-08	3.24e-07	Q9LTW0.1	ALA-interacting subunit 1; Short=AtALIS1
SMil_00001092	3.53444	0.00500064	0.0238867
SMil_00001118	-6.02932	0.000124398	0.00100435	Q9ZT71.1	Protein STABILIZED1
SMil_00001125	-7.35788	2.82e-07	4.19e-06	Q9LVN1.3	Formin-like protein 13; Short=AtFH13
SMil_00001149	-5.74992	0.000360179	0.00254254
SMil_00001158	3.4217	3.03e-16	1.86e-14	O64481.1	Subtilisin-like protease SBT2.5
SMil_00001163	-6.46889	0.000155931	0.00122153	PF13359	DDE superfamily endonuclease
SMil_00001169	-2.38785	9e-09	1.81e-07	PF4720	PDDEXK-like family of unknown function
SMil_00001266	-5.09431	0.0046219	0.022403	O65695.1	Auxin-responsive protein SAUR50
SMil_00001281	7.56942	8.12e-09	1.64e-07	Q8RY18.1	MATH domain-containing protein At5g43560
SMil_00001282	2.01155	2.51e-11	7.69e-10	PF13947	Wall-associated receptor kinase galacturonan-binding
SMil_00001293	-3.19867	0.00971972	0.0409718	F4I8K2.1	RHOMBOID-like protein 8; Short=AtRBL8
SMil_00001340	-2.23709	2.27e-23	2.95e-21	Q40746.1	Aquaporin NIP1-1
SMil_00001350	2.53498	0.00346537	0.0175743
SMil_00001359	-5.30716	9.94e-74	1.82e-70
SMil_00001371	6.50338	1.16e-05	0.00012179
SMil_00001376	7.08411	3.82e-08	6.72e-07	Q9M667.2	Disease resistance protein RPP13
SMil_00001385	-4.35921	3.91e-06	4.58e-05
SMil_00001398	-2.95144	0.000889399	0.00552889	Q941P9.1	Non-symbiotic hemoglobin 2
SMil_00001422	2.00652	2.08e-11	6.45e-10
SMil_00001431	-6.16725	0.000130675	0.00104809	Q94C59.2	Patellin-4
SMil_00001443	-2.5083	1.11e-06	1.47e-05
SMil_00001467	3.25547	0.00297722	0.0154768
SMil_00001471	-6.16523	1.19e-07	1.9e-06
SMil_00001477	-6.75084	7.4e-10	1.8e-08	Q9C9H7.2	Receptor-like protein 12; Short=AtRLP12
SMil_00001478	5.02186	0.0107703	0.044409
SMil_00001516	-4.23165	6.19e-09	1.28e-07	Q6NKX1.1	Proline dehydrogenase 2, mitochondrial
SMil_00001544	-2.14488	6.91e-05	0.000596412	Q9FK75.1	GDSL esterase/lipase At5g45670
SMil_00001550	-9.197	8.31e-14	3.84e-12
SMil_00001575	-4.50226	1.04e-12	4.03e-11	PF14111	Domain of unknown function (DUF4283)|PF14392
SMil_00001668	5.97163	5.35e-41	2.27e-38	Q8LPT9.1	Alpha-glucan water dikinase, chloroplastic
SMil_00001761	-2.21845	4.6e-08	7.96e-07	PF1156	Inosine-uridine preferring nucleoside hydrolase
SMil_00001769	-6.5658	1.71e-11	5.36e-10	Q42736.1	Pyruvate, phosphate dikinase, chloroplastic
SMil_00001789	2.08801	0.000983518	0.00600305	Q9LTJ1.1	Methyl-CpG-binding domain-containing protein 6; Short=AtMBD6; Short=MBD06
SMil_00001793	4.9075	5.43e-46	3.18e-43	Q3EDL4.2	Probable serine/threonine-protein kinase At1g01540
SMil_00001803	-2.02111	2.08e-08	3.87e-07	Q6NKW9.2	Glucan endo-1,3-beta-glucosidase 8
SMil_00001817	-4.11542	0.00222386	0.0120595
SMil_00001888	3.06551	6.17e-18	4.59e-16	Q0VFP5.1	Protein CWC15 homolog
SMil_00001889	-10.6436	7.49e-19	6.32e-17	PF1594	Domain of unknown function DUF20
SMil_00001901	8.70639	9.16e-13	3.55e-11
SMil_00001919	-5.67687	0.000777378	0.00492777
SMil_00001942	-4.88247	6.25e-12	2.1e-10
SMil_00001963	-5.8438	8.83e-07	1.19e-05	P28188.3	Ras-related protein RABD2a; Short=AtRABD2a
SMil_00002055	-3.25696	0.00101324	0.00615622
SMil_00002074	-8.67418	7.46e-12	2.48e-10
SMil_00002102	2.24927	0.0015886	0.00905954	Q0JEU6.2	G-type lectin S-receptor-like serine/threonine-protein kinase LECRK3; Short=OsLecRK3
SMil_00002104	-4.40825	0.00658769	0.0299941	Q9LY29.1	Ethylene-responsive transcription factor ERF115
SMil_00002192	-4.08605	3.67e-26	5.93e-24
SMil_00002206	-4.53952	4.5e-10	1.14e-08	Q9ZQ80.1	Nodulin-related protein 1; Short=AtNRP1
SMil_00002212	-2.74428	2.73e-09	6.01e-08	Q9C5W6.1	14-3-3-like protein GF14 iota
SMil_00002217	-6.3285	4.57e-05	0.000412431
SMil_00002226	6.79145	2.58e-06	3.12e-05	Q9LQ54.3	Probable disease resistance protein At1g59620
SMil_00002233	6.8225	1.9e-06	2.37e-05
SMil_00002234	2.02498	4.81e-16	2.91e-14	Q0WPH8.1	Serine/threonine-protein kinase Nek5
SMil_00002240	-6.83385	1.58e-06	2.03e-05	Q3EAL1.1	Transcription repressor OFP6
SMil_00002284	-4.23365	1.78e-05	0.000178836
SMil_00002300	10.3287	8.7e-18	6.32e-16	P0C897.1	Putative UPF0481 protein At3g02645
SMil_00002308	-5.97563	0.00770774	0.0338521
SMil_00002326	-2.76753	6.58e-05	0.000570307
SMil_00002354	7.3318	1.48e-07	2.32e-06
SMil_00002372	9.66648	1.56e-15	8.83e-14
SMil_00002401	-4.04358	0.00434298	0.0212921
SMil_00002417	-5.49063	0.000183572	0.0014035	P0C2F6.1	Putative ribonuclease H protein At1g65750
SMil_00002421	2.04582	1.03e-19	9.54e-18
SMil_00002436	-3.02842	1.48e-06	1.91e-05	Q94DB8.1	Inorganic phosphate transporter 1-11; Short=OsPT11; Short=OsPht1;11
SMil_00002445	-6.57474	4.17e-07	5.98e-06
SMil_00002451	6.9007	1.1e-07	1.77e-06	Q6UNT2.1	60S ribosomal protein L5
SMil_00002453	-5.94505	0.000337813	0.00240613	Q9XIB6.1	Pollen-specific leucine-rich repeat extensin-like protein 2; Short=AtPEX2; Short=Pollen-specific LRR/EXTENSIN2
SMil_00002479	8.22912	8.09e-11	2.3e-09	Q9LHB1.1	Factor of DNA methylation 3
SMil_00002482	3.89199	1.59e-06	2.03e-05	B0JHV3.1	Elongation factor P; Short=EF-P
SMil_00002490	-12.25	1.11e-24	1.57e-22
SMil_00002494	8.8361	1.9e-12	7e-11
SMil_00002505	-3.42678	1.07e-05	0.00011265	Q94AZ4.1	Probable calcium-binding protein CML13
SMil_00002538	-5.91353	0.00249859	0.0133442
SMil_00002559	3.22051	9.98e-12	3.26e-10	Q9FLJ2.1	NAC domain-containing protein 100; Short=ANAC100; Short=AtNAC5
SMil_00002600	-4.74053	1.24e-05	0.00012831	Q9SVG5.1	Berberine bridge enzyme-like 18; Short=AtBBE-like 18
SMil_00002637	7.11453	2.38e-07	3.59e-06
SMil_00002644	-3.75871	2.2e-27	4.02e-25	Q9FHH8.2	Zinc finger protein CONSTANS-LIKE 5
SMil_00002654	6.42388	1.07e-06	1.42e-05	PF7712	Stress up-regulated Nod 19
SMil_00002673	3.25481	0.000454663	0.00311776	O48767.2	AUGMIN subunit 2
SMil_00002679	-7.32704	2.28e-15	1.28e-13	PF2298	Plastocyanin-like domain
SMil_00002687	-4.10638	5.53e-14	2.62e-12
SMil_00002694	5.51457	0.00195277	0.0107894	P0C2F6.1	Putative ribonuclease H protein At1g65750
SMil_00002701	-8.08417	3.53e-05	0.00032795	PF4043	Plant invertase/pectin methylesterase inhibitor
SMil_00002704	-3.52141	3.7e-10	9.47e-09
SMil_00002782	-10.571	1.26e-18	1.02e-16
SMil_00002869	-4.06041	0.00869794	0.0373368
SMil_00002883	5.53751	0.000177215	0.00136417
SMil_00002884	5.76576	0.000457526	0.00313446
SMil_00002901	-4.01048	4.35e-05	0.00039522
SMil_00002906	-5.54836	7.75e-23	9.57e-21	Q9SGZ5.2	Probable beta-D-xylosidase 7; Short=AtBXL7
SMil_00002971	-5.18021	0.000363025	0.00256078	Q94F47.1	Ubiquitin-conjugating enzyme E2 28
SMil_00002972	-3.87201	0.000929459	0.00573408	Q9SS38.3	DNA gyrase subunit B, chloroplastic
SMil_00002998	4.8409	1.67e-31	4.08e-29
SMil_00003013	-7.84756	0.0082629	0.0358267	Q5W736.1	CBL-interacting protein kinase 18
SMil_00003015	3.9937	1.17e-06	1.54e-05
SMil_00003034	-4.59261	5.29e-07	7.45e-06	PF1988	VIT family
SMil_00003038	5.25409	0.00253184	0.0134947
SMil_00003042	-5.18613	0.00411324	0.0203245
SMil_00003070	-2.98019	8.08e-08	1.32e-06	Q8VY92.1	Transmembrane emp24 domain-containing protein p24delta10
SMil_00003158	11.8838	3.6e-23	4.59e-21	P37119.1	Cytochrome P450 71A3
SMil_00003163	-3.51519	0.000729809	0.00467279	Q5J907.1	Translationally-controlled tumor protein homolog; Short=TCTP
SMil_00003171	-6.69001	7.07e-05	0.000608442
SMil_00003179	-5.90148	6.87e-40	2.76e-37	Q91Y26.1	Nucleolar complex protein 3 homolog; Short=NOC3 protein homolog
SMil_00003239	5.80973	0.000556921	0.00371031
SMil_00003285	-7.18924	8.9e-06	9.59e-05
SMil_00003289	-3.02154	9.23e-12	3.04e-10	Q9LTW5.1	Serine/threonine-protein kinase AGC1-5
SMil_00003318	-2.63618	0.0106478	0.0439845
SMil_00003350	-8.69586	4.73e-12	1.62e-10	Q0DTM7.2	Cyclin-J18-like
SMil_00003367	-5.17469	0.00371202	0.0186378
SMil_00003405	3.76126	0.000281851	0.00204739
SMil_00003406	-6.15455	9.48e-05	0.000791117
SMil_00003438	-2.22047	0.00577964	0.0269566	Q9SMZ2.1	Pentatricopeptide repeat-containing protein At4g33170
SMil_00003452	-3.84247	1.45e-06	1.87e-05
SMil_00003465	-2.78064	6.73e-10	1.64e-08	Q8S8I1.1	QWRF motif-containing protein 3
SMil_00003482	-7.26505	3.64e-08	6.45e-07	P03010.1	Putative AC9 transposase
SMil_00003569	-6.32357	2.23e-08	4.12e-07	Q9SWG3.1	Protein FAR-RED IMPAIRED RESPONSE 1
SMil_00003587	-3.26083	2.11e-08	3.92e-07	Q9SF37.2	Probable DNA helicase MCM8
SMil_00003588	2.41206	3.36e-07	4.93e-06	Q9SF38.1	Pentatricopeptide repeat-containing protein At3g09650, chloroplastic
SMil_00003596	4.3086	0.00222137	0.0120506	P93295.1	Uncharacterized mitochondrial protein AtMg00310
SMil_00003612	2.38722	0.00564339	0.0264095	PF13947	Wall-associated receptor kinase galacturonan-binding
SMil_00003644	-2.95971	0.000905457	0.00560965	Q1LXS2.1	Proteasome assembly chaperone 2
SMil_00003645	-2.131	1.23e-08	2.4e-07	Q10EJ2.1	CASP-like protein 5C1; Short=OsCASPL5C1
SMil_00003647	-4.81274	1.28e-12	4.87e-11	Q9XIM8.1	Pentatricopeptide repeat-containing protein At2g15980
SMil_00003648	-5.4279	0.00143063	0.00829821	PF3107	C1 domain
SMil_00003662	-7.81802	2.02e-09	4.52e-08	Q1RMW2.1	Transmembrane protein 184A
SMil_00003663	-4.36041	0.00763798	0.0336152
SMil_00003680	-3.82834	1.9e-07	2.9e-06	PF3168	Late embryogenesis abundant protein
SMil_00003681	-2.35826	1.24e-05	0.000128203	P10978.1	Retrovirus-related Pol polyprotein from transposon TNT 1-94
SMil_00003691	-6.81364	3.38e-05	0.00031511	Q8LGU1.3	ABC transporter C family member 8; Short=ABC transporter ABCC.8; Short=AtABCC8
SMil_00003724	3.15839	0.000176813	0.0013625	Q69UE6.1	Acyl transferase 10; Short=OsAT10
SMil_00003729	-5.44148	0.00349325	0.0176972
SMil_00003749	2.80601	0.0101978	0.0424612
SMil_00003759	-6.69551	5.38e-09	1.12e-07	Q9LF97.1	CBS domain-containing protein CBSCBSPB3
SMil_00003761	-6.07733	1.92e-05	0.000191152	Q946Y7.1	Syntaxin-61; Short=AtSYP61
SMil_00003792	-6.03625	0.000139602	0.00110965	Q9LIP3.2	Cytochrome P450 71B37
SMil_00003798	-2.41323	1.76e-10	4.73e-09
SMil_00003829	6.72395	2.07e-06	2.56e-05
SMil_00003850	-8.43798	1.53e-11	4.84e-10
SMil_00003882	-7.2142	1e-06	1.33e-05	Q9M9W1.1	60S ribosomal protein L22-2
SMil_00003913	2.08296	1.09e-12	4.17e-11	Q8GW72.2	Alpha-L-fucosidase 1
SMil_00003948	-4.731	0.000517575	0.00348788	F4I114.1	Probable serine/threonine-protein kinase At1g09600
SMil_00003959	6.07336	7.13e-05	0.000613312	Q9ULR0.3	Pre-mRNA-splicing factor ISY1 homolog
SMil_00003964	-4.88441	0.000635097	0.00414527	Q6AVI0.1	Zinc finger BED domain-containing protein RICESLEEPER 2
SMil_00003965	5.31451	0.0030672	0.015874
SMil_00003975	-5.3457	0.000210541	0.00158241
SMil_00004024	-6.24378	4.34e-05	0.000394974
SMil_00004042	-3.02776	1.23e-05	0.000127718	PF13963	Transposase-associated domain
SMil_00004043	-2.07838	7.16e-05	0.000615263
SMil_00004044	-6.75214	1.58e-06	2.03e-05
SMil_00004071	-6.06224	1.13e-05	0.000118537
SMil_00004180	6.09571	7.56e-08	1.24e-06
SMil_00004183	-4.05924	1.16e-18	9.48e-17	P0C897.1	Putative UPF0481 protein At3g02645
SMil_00004184	-4.67223	2.16e-05	0.00021219	Q9SD53.1	UPF0481 protein At3g47200
SMil_00004188	-3.41522	4.76e-06	5.46e-05	PF3140	Plant protein of unknown function
SMil_00004213	-4.92257	1.05e-15	6.09e-14	Q84JS6.1	Homeobox protein knotted-1-like 6
SMil_00004233	-2.15945	5.06e-11	1.48e-09
SMil_00004235	2.60977	3.81e-07	5.52e-06	Q9ZUX4.1	Uncharacterized protein At2g27730, mitochondrial
SMil_00004237	-3.27629	6.15e-05	0.000537299	PF11250	Fantastic Four meristem regulator
SMil_00004267	10.3833	7.77e-18	5.7e-16
SMil_00004276	-5.51175	0.00150226	0.00863276	PF2902	Ulp1 protease family, C-terminal catalytic domain
SMil_00004298	-7.35745	1.26e-06	1.65e-05
SMil_00004307	-5.08094	0.00719275	0.032139	Q9FKS8.1	Lysine histidine transporter 1
SMil_00004320	-2.4348	0.00800759	0.0349684
SMil_00004350	7.00928	1.52e-10	4.11e-09	PF4937	Protein of unknown function (DUF 659)
SMil_00004356	2.05418	1.21e-17	8.63e-16	Q9LSM5.1	Protein ecdysoneless homolog
SMil_00004364	-3.9234	1.67e-26	2.81e-24	Q5JNJ5.1	Early nodulin-like protein 1; Short=OsENODL1
SMil_00004406	2.36498	2.84e-21	3.07e-19	PF3031	NLI interacting factor-like phosphatase
SMil_00004408	6.3853	1.54e-05	0.000157031
SMil_00004412	2.26465	1.97e-14	9.84e-13	O22227.1	Protein MIZU-KUSSEI 1
SMil_00004458	-5.11037	0.00496735	0.0237432
SMil_00004485	-2.68052	2.36e-21	2.6e-19	Q41141.1	Pyrophosphate--fructose 6-phosphate 1-phosphotransferase subunit beta; Short=PFP
SMil_00004514	-2.0392	0.00617282	0.0284652
SMil_00004515	-3.58098	4.45e-05	0.000403384	PF4842	Plant protein of unknown function (DUF639)
SMil_00004533	3.03663	4.36e-09	9.25e-08	H2DH21.1	Cytochrome P450 CYP72A219
SMil_00004535	-3.17677	1.51e-32	4.01e-30	Q9M084.1	Aspartate--tRNA ligase 2, cytoplasmic
SMil_00004542	-2.65372	0.000102129	0.000842686	P40941.2	ADP,ATP carrier protein 2, mitochondrial
SMil_00004572	-2.64075	0.0123023	0.049594	Q39547.1	Cucumisin
SMil_00004599	-7.48494	3.94e-06	4.61e-05	PF13359	DDE superfamily endonuclease
SMil_00004602	-7.67505	5.73e-06	6.47e-05	PF13359	DDE superfamily endonuclease
SMil_00004637	10.789	2.54e-19	2.23e-17
SMil_00004641	-6.46242	0.000599018	0.0039512	PF13920	Zinc finger, C3HC4 type (RING finger)
SMil_00004647	2.48727	0.000529435	0.00355243	Q8BKC5.3	Importin-5; Short=Imp5
SMil_00004651	3.66434	4.08e-20	4e-18	Q5M755.1	Probable plastid-lipid-associated protein 7, chloroplastic
SMil_00004658	-6.61542	0.000679526	0.00440871	P48418.1	Flavonoid 3',5'-hydroxylase 1; Short=F3'5'H
SMil_00004664	2.75802	4.76e-35	1.51e-32
SMil_00004689	2.93416	1.55e-16	9.75e-15	Q9C723.1	Glutamine-dependent NAD(+) synthetase
SMil_00004693	3.42657	0.00588211	0.0273735	PF6966	Protein of unknown function (DUF1295)
SMil_00004717	-1.99668	2.47e-05	0.000238814	Q9FMS6.1	Probable CCR4-associated factor 1 homolog 11
SMil_00004730	-2.36962	0.0074575	0.0330394	Q8VYV9.1	Aspartyl protease family protein 1
SMil_00004771	2.22025	2.17e-09	4.83e-08
SMil_00004810	-4.13031	0.00157809	0.00900836	Q9M2A0.1	ATPase 8, plasma membrane-type
SMil_00004812	2.65025	1.33e-06	1.73e-05	Q9C9Y4.1	F-box protein At3g08750
SMil_00004831	2.3027	0.000241417	0.00178603	Q6K4V2.1	Bidirectional sugar transporter SWEET4; Short=OsSWEET4 >A2X3S3.1
SMil_00004871	-7.50674	2.54e-08	4.63e-07
SMil_00004874	-2.07417	3.49e-24	4.82e-22	PF5755	Rubber elongation factor protein (REF)
SMil_00004880	-2.81144	1.66e-06	2.12e-05
SMil_00004884	-2.65758	3.79e-12	1.32e-10	C0LGH3.2	Probable LRR receptor-like serine/threonine-protein kinase At1g56140
SMil_00004885	-2.63756	2.26e-18	1.78e-16	Q7XKE9.1	Clathrin light chain 1
SMil_00004891	-2.09597	8.12e-20	7.72e-18	O49818.1	Lactoylglutathione lyase
SMil_00004893	-3.89015	2.14e-08	3.97e-07	Q9FJH5.1	Heavy metal-associated isoprenylated plant protein 3; Short=AtHIP03; Short=AtHIPP3
SMil_00004907	-3.84943	0.00664605	0.0301691	Q5D018.1	RNA-binding protein 8A
SMil_00004911	-6.99502	9.15e-13	3.55e-11	PF4398	Protein of unknown function, DUF538
SMil_00004970	-3.00154	0.00276429	0.0145549	Q70PR7.2	Vinorine synthase
SMil_00004981	-6.07297	9.36e-05	0.000782057
SMil_00004988	3.3575	1.2e-19	1.1e-17
SMil_00005012	2.5175	0.000881022	0.00548264
SMil_00005034	-2.84185	9.72e-12	3.18e-10	O22446.2	Histone deacetylase 19; Short=AtHD1; Short=HD
SMil_00005061	2.67768	0.00019251	0.00146381	Q8VZ79.1	Protein INVOLVED IN DE NOVO 2
SMil_00005069	-4.48987	1.27e-07	2e-06	Q9M0Y3.1	Equilibrative nucleotide transporter 3; Short=AtENT3
SMil_00005076	-5.61271	0.000325481	0.00233191
SMil_00005092	-3.49304	0.00944922	0.0400044	Q9M2N5.1	Zinc finger BED domain-containing protein DAYSLEEPER
SMil_00005152	-3.02346	2.88e-05	0.000273822	F4I460.1	Myosin-8
SMil_00005215	3.91753	1.33e-07	2.1e-06	Q9M9C5.1	Probable leucine-rich repeat receptor-like protein kinase At1g68400
SMil_00005219	4.70594	4.91e-15	2.65e-13	P03010.1	Putative AC9 transposase
SMil_00005233	-2.18305	7.97e-19	6.64e-17
SMil_00005249	4.42088	0.00635283	0.0291424	Q9LMX7.1	Cytochrome P450 78A5
SMil_00005280	-7.74939	9.2e-09	1.85e-07	O64788.1	FBD-associated F-box protein At1g61320
SMil_00005287	-7.26011	4.73e-05	0.000425367
SMil_00005294	-3.06649	0.000232741	0.00173149	PF10950	Protein of unknown function (DUF2775)
SMil_00005333	-6.05993	1.19e-05	0.000123685	P29503.2	Protein neuralized
SMil_00005371	-3.0805	1.64e-05	0.00016615	Q8VYP9.1	Probable isoprenylcysteine alpha-carbonyl methylesterase ICMEL1
SMil_00005405	-2.10259	8.94e-10	2.13e-08
SMil_00005420	-7.65334	1.44e-05	0.000147487
SMil_00005421	3.90586	0.00408094	0.0202025	Q7XU38.3	Cytochrome P450 87A3
SMil_00005487	-4.19359	2.12e-11	6.55e-10
SMil_00005494	-2.04651	1.23e-06	1.61e-05	P52425.1	Glycerol-3-phosphate dehydrogenase [NAD(+)]
SMil_00005522	-8.59327	6.71e-12	2.24e-10
SMil_00005527	-6.1861	1.13e-17	8.12e-16	O48782.2	Heme oxygenase 1, chloroplastic; Short=AtHO1
SMil_00005570	-6.93795	4.19e-07	6e-06
SMil_00005592	4.23758	8.96e-39	3.41e-36	P0DI74.1	Protein transport protein Sec61 subunit gamma-1 >P0DI75.1 RecName
SMil_00005629	-9.19395	3.34e-14	1.63e-12
SMil_00005636	-7.00101	2.33e-09	5.18e-08	F8WKW8.1	Beta-D-glucosyl crocetin beta-1,6-glucosyltransferase
SMil_00005647	-6.97045	0.000184848	0.00141215	P22242.1	Desiccation-related protein PCC13-62
SMil_00005675	-3.36989	4e-09	8.51e-08	Q38890.1	Endoglucanase 25
SMil_00005681	3.09694	0.00404243	0.0200427
SMil_00005690	8.32761	7.16e-11	2.05e-09	Q0WQF4.1	Vacuolar protein sorting-associated protein 53 A; Short=AtVPS53
SMil_00005702	-2.27463	9.86e-09	1.97e-07	Q9C907.1	Glycerophosphodiester phosphodiesterase GDPD5
SMil_00005709	-4.54767	1.45e-23	1.92e-21	P26360.2	ATP synthase subunit gamma, mitochondrial
SMil_00005736	-2.12356	0.0113349	0.0463126	Q5XJ13.1	Ankyrin repeat and SAM domain-containing protein 6
SMil_00005770	-6.8741	2.75e-10	7.18e-09	P26300.1	Enolase
SMil_00005771	-5.2004	1.11e-76	2.7e-73
SMil_00005794	-4.11065	4.28e-10	1.08e-08	Q5BQN5.1	WPP domain-associated protein
SMil_00005795	-2.09414	5.96e-12	2.01e-10	Q9SX80.1	Polyadenylate-binding protein RBP47C'; Short=Poly(A)-binding protein RBP47C'
SMil_00005801	-2.03018	0.00460598	0.0223517
SMil_00005835	-3.43437	5.42e-05	0.00047903	Q9CA30.1	LOB domain-containing protein 42
SMil_00005844	2.53352	4.13e-07	5.93e-06	Q9FJZ9.1	Peroxidase 72; Short=Atperox P72
SMil_00005893	2.12269	1.84e-05	0.000183834	P52711.1	Serine carboxypeptidase II-3
SMil_00005914	-6.09848	6.04e-05	0.000528747
SMil_00005923	-5.05804	0.0103928	0.0431135	PF7765	KIP1-like protein
SMil_00005938	3.28697	4.64e-37	1.64e-34	PF8597	Translation initiation factor eIF3 subunit
SMil_00005939	2.09146	1.48e-05	0.000151086	Q9FKL6.1	Calmodulin-binding protein 60 B
SMil_00005946	4.23734	0.00026711	0.00195291	Q9FX60.3	Histone H3-like 1
SMil_00005969	-3.3255	1.63e-23	2.14e-21	Q9LZG0.1	Adenosine kinase 2; Short=AK 2
SMil_00005977	-5.01948	3.08e-08	5.54e-07	PF8268	F-box associated domain
SMil_00006038	-5.90139	0.00222431	0.0120595
SMil_00006042	-2.7523	0.000177662	0.00136653
SMil_00006100	-4.16416	2.55e-22	3.04e-20	Q9SUT9.1	Reticulon-like protein B2; Short=AtRTNLB2
SMil_00006118	-9.12896	1.79e-13	7.83e-12	Q43725.3	Cysteine synthase, mitochondrial
SMil_00006138	2.79061	0.00373768	0.0187473
SMil_00006139	-6.52056	7.14e-06	7.86e-05
SMil_00006186	-2.67048	5.27e-05	0.00046836
SMil_00006243	-2.29258	7.04e-15	3.73e-13	Q9SU94.1	Protein arginine N-methyltransferase 1.1; Short=AtPRMT11
SMil_00006249	7.26803	1.08e-07	1.73e-06	O22229.2	NADPH-dependent thioredoxin reductase 3; Short=NTR3
SMil_00006263	-5.27898	0.000425512	0.00294121
SMil_00006265	-3.68349	7.42e-09	1.52e-07	Q50EK1.1	Cytochrome P450 716B1
SMil_00006307	5.03607	0.00752186	0.0332441
SMil_00006308	5.63135	3.04e-34	9.37e-32
SMil_00006330	7.04816	5.33e-07	7.49e-06
SMil_00006338	7.07157	3.61e-08	6.41e-07
SMil_00006339	3.94052	0.00738086	0.0327644	Q6VMW0.1	8-hydroxyquercetin 8-O-methyltransferase
SMil_00006346	-4.73164	0.000192716	0.00146499	PF12937	F-box-like
SMil_00006399	-9.31514	2.87e-14	1.41e-12	Q9ASS7.1	Cationic amino acid transporter 2, vacuolar
SMil_00006451	2.16499	7.31e-09	1.5e-07
SMil_00006460	4.79654	5.03e-08	8.63e-07
SMil_00006499	6.97367	4.02e-07	5.79e-06
SMil_00006599	-3.55542	3.61e-09	7.72e-08
SMil_00006603	-5.91015	5.05e-13	2.04e-11	Q9LHL3.1	La-related protein 6C; Short=AtLARP6c
SMil_00006622	-4.3635	2.05e-05	0.000202874
SMil_00006670	-11.3432	2.77e-21	3.01e-19	P26360.2	ATP synthase subunit gamma, mitochondrial
SMil_00006696	3.35951	0.0001418	0.00112377	PF3004	Plant transposase (Ptta/En/Spm family)|PF13952
SMil_00006701	-3.49599	4.12e-07	5.92e-06
SMil_00006708	-4.73162	4.49e-06	5.18e-05	Q9FL59.1	FT-interacting protein 1
SMil_00006709	-5.21635	3.57e-33	1.01e-30	Q7XSN9.2	Actin-depolymerizing factor 6; Short=ADF-6; Short=OsADF6
SMil_00006735	-5.02002	4.86e-10	1.21e-08	PF13920	Zinc finger, C3HC4 type (RING finger)
SMil_00006751	-3.30766	2.38e-09	5.28e-08	O48916.1	Dihydroceramide fatty acyl 2-hydroxylase FAH1
SMil_00006766	-3.46289	1.27e-17	9.03e-16	Q9SJM7.2	Uridine nucleosidase 1
SMil_00006794	-3.44545	7.49e-21	7.8e-19	Q84W80.2	F-box/LRR-repeat protein At3g03360
SMil_00006803	-3.1573	6.53e-14	3.09e-12	Q84W80.2	F-box/LRR-repeat protein At3g03360
SMil_00006840	-7.40461	2.07e-08	3.86e-07	Q9SJR0.1	Ethylene-responsive transcription factor ERF024
SMil_00006845	3.02475	3.66e-09	7.81e-08
SMil_00006852	2.56538	7.66e-09	1.56e-07	Q9ZT50.1	E3 ubiquitin-protein ligase RHA2A
SMil_00006883	3.18567	3.08e-36	1.04e-33	Q6UNT2.1	60S ribosomal protein L5
SMil_00006934	-4.85151	0.00145462	0.00840852
SMil_00006942	-4.45561	3.05e-09	6.66e-08	Q6LN63.2	Hydroxyacylglutathione hydrolase
SMil_00006951	-4.96923	4.52e-05	0.000408929	PF1699	Sodium/calcium exchanger protein|PF13499
SMil_00006959	7.05507	1.13e-06	1.49e-05
SMil_00006965	-6.16425	0.000317389	0.00227954
SMil_00006972	-7.93932	5.19e-10	1.29e-08
SMil_00006977	7.21958	8.78e-08	1.43e-06	PF13966	zinc-binding in reverse transcriptase|PF13456
SMil_00006984	-2.51382	7.79e-12	2.58e-10	Q9SLN8.1	2-alkenal reductase (NADP(+)-dependent)
SMil_00006986	7.11349	1.83e-07	2.8e-06
SMil_00006988	-2.85632	3.88e-10	9.91e-09
SMil_00007010	3.05328	3.73e-05	0.000345246
SMil_00007049	8.81845	4.34e-13	1.76e-11	P35100.1	Chaperone protein ClpC, chloroplastic
SMil_00007074	-5.43282	3.64e-06	4.29e-05	Q3E8Z8.1	Putative pectinesterase/pectinesterase inhibitor 28
SMil_00007078	-5.20588	1.35e-05	0.000138684
SMil_00007096	-6.3036	6e-05	0.000524781	Q8W1Y0.1	Sister chromatid cohesion 1 protein 4; Short=AtRAD21-3; Short=AtRAD21.3
SMil_00007099	-4.01636	1.4e-07	2.2e-06	Q9FFD0.2	Auxin efflux carrier component 5; Short=AtPIN5
SMil_00007121	5.41049	1.05e-15	6.09e-14	P93394.1	Uracil phosphoribosyltransferase; Short=UPRTase
SMil_00007124	4.0351	7.66e-09	1.56e-07
SMil_00007169	-4.56252	1.51e-22	1.84e-20	Q67ZM4.1	Actin-depolymerizing factor 7; Short=ADF-7; Short=AtADF7
SMil_00007193	5.73088	0.00113023	0.00677976	O22798.1	NAC domain-containing protein 41; Short=ANAC041
SMil_00007198	5.11458	0.00511425	0.0243182	P82413.2	50S ribosomal protein L19, chloroplastic
SMil_00007202	-3.04522	2.06e-18	1.63e-16	C0LGP4.1	Probable LRR receptor-like serine/threonine-protein kinase At3g47570
SMil_00007210	-2.08039	8.92e-15	4.67e-13	Q41144.1	Sugar carrier protein C
SMil_00007247	-5.28758	0.00409941	0.0202665	Q940J1.2	Homeobox-leucine zipper protein ATHB-16
SMil_00007248	-4.35014	3.65e-05	0.000337885
SMil_00007270	2.22497	1.7e-06	2.16e-05
SMil_00007290	2.71382	0.00794501	0.0347521	Q49KZ2.1	ATP synthase epsilon chain, chloroplastic
SMil_00007345	-2.14384	4.45e-11	1.31e-09
SMil_00007357	5.56146	0.00320319	0.0164333	Q67YM6.1	Dirigent protein 11; Short=AtDIR11
SMil_00007370	3.56409	0.0021785	0.0118522
SMil_00007373	-3.25582	1.08e-10	2.97e-09	Q9SX28.1	GDT1-like protein 5
SMil_00007380	-4.61606	0.00680352	0.0307377
SMil_00007398	-3.26713	6.19e-10	1.51e-08	Q9FX89.2	Putative F-box protein At1g49610
SMil_00007399	-2.17756	0.000128745	0.00103487	Q9LJF8.2	F-box/LRR-repeat protein At3g26922
SMil_00007407	2.47195	5.03e-45	2.63e-42	Q8GY97.1	CMP-sialic acid transporter 2; Short=CMP-SA-Tr 2; Short=CMP-Sia-Tr 2
SMil_00007421	8.52065	8.68e-12	2.87e-10
SMil_00007449	-4.35907	2.91e-13	1.22e-11
SMil_00007452	4.21837	1.39e-08	2.71e-07
SMil_00007467	2.04663	2.86e-10	7.41e-09	Q9FZ84.1	Glycine-rich RNA-binding protein 6, mitochondrial; Short=AtGR-RBP6
SMil_00007511	-2.90855	0.000297102	0.00214592	PF13855	Leucine rich repeat
SMil_00007539	-2.13625	2.96e-21	3.18e-19	O23492.1	Inositol transporter 4
SMil_00007540	-3.11118	3.36e-07	4.93e-06
SMil_00007575	-4.44389	2.88e-23	3.72e-21	Q9LPR6.1	Tetraspanin-11
SMil_00007599	-2.08139	2.87e-05	0.000273397	Q40784.1	Putative glucose-6-phosphate 1-epimerase
SMil_00007610	-5.84601	0.000149552	0.00117628	Q9FFF9.1	Anaphase-promoting complex subunit 1
SMil_00007660	-2.82829	3.52e-13	1.46e-11	P46254.1	Heat shock 22 kDa protein, mitochondrial
SMil_00007684	-5.93248	0.00188633	0.0104877
SMil_00007730	-2.13959	0.00830305	0.0359742	PF4832	SOUL heme-binding protein
SMil_00007736	2.60442	9.99e-25	1.45e-22
SMil_00007743	-6.02847	0.000105181	0.00086446	Q9FF46.1	ABC transporter G family member 28; Short=ABC transporter ABCG.28; Short=AtABCG28
SMil_00007764	-5.88247	0.00915214	0.0389495
SMil_00007773	-6.0323	1.64e-05	0.00016615	Q9FXJ1.1	GDSL esterase/lipase At1g28570
SMil_00007775	1.99861	1.15e-08	2.28e-07	P33444.4	40S ribosomal protein S3a
SMil_00007810	3.12676	8.96e-05	0.000752372
SMil_00007813	-4.90932	6.04e-46	3.46e-43	PF6825	Heat shock factor binding protein 1
SMil_00007814	3.45822	0.00686932	0.0309537
SMil_00007823	-7.14776	1.07e-18	8.86e-17
SMil_00007858	6.6737	1.72e-05	0.000173364
SMil_00007864	-2.70693	0.000499159	0.0033809	K7TQE3.1	HSP-interacting protein
SMil_00007865	5.67213	0.000576867	0.00382405	Q9SMX9.2	Squamosa promoter-binding-like protein 1
SMil_00007870	3.32569	0.00668447	0.0303074	Q9LRR4.1	Putative disease resistance RPP13-like protein 1
SMil_00007895	-5.89232	0.0104444	0.0433032
SMil_00007927	7.73432	7.65e-19	6.41e-17	Q9FX99.1	Probable receptor-like protein kinase At1g49730
SMil_00007987	-10.3658	8.29e-18	6.07e-16
SMil_00007990	-7.51693	1.4e-08	2.71e-07	Q9FNA3.1	Alpha-N-acetylglucosaminidase
SMil_00007992	-7.68424	3.12e-09	6.77e-08	Q0WPH8.1	Serine/threonine-protein kinase Nek5
SMil_00007994	-3.06985	1.17e-05	0.000122505
SMil_00007997	-3.01522	0.0102019	0.0424698	O24038.1	Non-specific lipid-transfer protein 2; Short=LTP 2
SMil_00008017	5.1151	0.0059413	0.0275963
SMil_00008028	-5.54786	4.47e-08	7.76e-07	P17784.2	Fructose-bisphosphate aldolase 1, cytoplasmic
SMil_00008076	5.95941	0.000425031	0.00293867	Q9XI05.2	Proteasome subunit beta type-3-A
SMil_00008087	-6.64583	5.61e-06	6.34e-05	PF5347	Complex 1 protein (LYR family)
SMil_00008098	-4.60331	4.16e-10	1.06e-08	Q9FMV3.1	CBS domain-containing protein CBSCBSPB1
SMil_00008141	-4.05603	5.58e-09	1.16e-07	Q9SUK9.2	Probable protein phosphatase 2C 55; Short=AtPP2C55
SMil_00008150	-5.98333	0.0001	0.000827831
SMil_00008160	-2.42943	3.35e-12	1.18e-10	A2BF66.1	HORMA domain-containing protein 1
SMil_00008241	2.05131	1.72e-06	2.18e-05
SMil_00008249	-6.50145	8.61e-06	9.3e-05
SMil_00008254	-6.57222	1.79e-05	0.000179753
SMil_00008279	-6.94221	1.16e-05	0.000121749
SMil_00008306	-8.2768	2.73e-09	6.01e-08	Q5YLB4.1	DNA gyrase subunit B, chloroplastic/mitochondrial
SMil_00008307	2.57171	0.000270573	0.00197576
SMil_00008318	7.9055	7.54e-10	1.83e-08
SMil_00008332	-5.58122	0.000191021	0.00145437	PF13359	DDE superfamily endonuclease
SMil_00008390	-3.51825	0.000197419	0.00149618
SMil_00008410	-2.9198	3.38e-12	1.19e-10	Q8S9J8.2	Probable clathrin assembly protein At4g32285
SMil_00008425	-8.56169	5.6e-09	1.16e-07
SMil_00008430	-5.72436	0.000606235	0.0039925	Q6AVI0.1	Zinc finger BED domain-containing protein RICESLEEPER 2
SMil_00008433	-4.82019	4.16e-08	7.26e-07
SMil_00008434	3.13271	2.15e-05	0.00021219	Q94KD3.1	Vacuolar protein sorting-associated protein 52 A; Short=AtVPS52
SMil_00008482	2.44283	1.16e-07	1.85e-06	PF14009	Domain of unknown function (DUF4228)
SMil_00008511	-3.01974	2.56e-14	1.26e-12	Q9FUS8.1	Glutathione S-transferase U17; Short=AtGSTU17
SMil_00008512	9.37758	7.19e-15	3.8e-13
SMil_00008513	2.44549	2.73e-10	7.13e-09	Q9FUS8.1	Glutathione S-transferase U17; Short=AtGSTU17
SMil_00008542	5.90616	0.000157001	0.00122761
SMil_00008549	-2.71869	4.35e-06	5.03e-05	Q15751.2	Probable E3 ubiquitin-protein ligase HERC1
SMil_00008559	-2.68238	1.89e-06	2.37e-05	Q43077.1	Primary amine oxidase
SMil_00008611	-2.17313	0.00115467	0.00690514
SMil_00008622	-4.65738	3.77e-05	0.000348158	Q9S7N2.1	L-tryptophan--pyruvate aminotransferase 1
SMil_00008623	-2.45329	0.000214115	0.00160639	F4IB81.1	LysM domain receptor-like kinase 3; Short=LysM-containing receptor-like kinase 3
SMil_00008628	2.71981	4.64e-18	3.49e-16
SMil_00008653	-6.44919	1.47e-05	0.000150593
SMil_00008663	-8.70843	3.8e-12	1.32e-10	P09189.1	Heat shock cognate 70 kDa protein
SMil_00008713	-7.66927	0.00151335	0.00868797	Q494P0.2	Probable inorganic phosphate transporter 1-7; Short=AtPht1;7
SMil_00008731	6.29471	3.94e-05	0.000361895
SMil_00008750	-10.4209	4.05e-18	3.07e-16	Q9FGR0.2	Cleavage and polyadenylation specificity factor subunit 1
SMil_00008754	-6.67718	2.7e-06	3.25e-05
SMil_00008772	2.46686	9.09e-13	3.54e-11	O49133.1	D-galacturonate reductase; Short=FaGalUR
SMil_00008782	2.62776	0.0118703	0.0480644
SMil_00008783	-7.9501	1.25e-09	2.9e-08
SMil_00008836	5.25547	0.00272871	0.0143972
SMil_00008862	-2.15321	5.79e-13	2.31e-11	P09189.1	Heat shock cognate 70 kDa protein
SMil_00008873	4.28613	8.85e-05	0.000743964
SMil_00008874	6.14854	1.08e-17	7.77e-16	Q60CZ8.1	Putative late blight resistance protein homolog R1A-10 >Q6L438.2 RecName
SMil_00008901	-5.44503	0.0113983	0.0465197	PF234	Protease inhibitor/seed storage/LTP family
SMil_00008916	-5.30752	0.000159448	0.00124387	Q9LJE2.1	Lysine--tRNA ligase, chloroplastic/mitochondrial
SMil_00008918	-5.01814	9.08e-16	5.32e-14
SMil_00008930	4.72005	1.48e-06	1.91e-05
SMil_00008936	-4.97589	1.18e-12	4.49e-11	Q8L4Y2.1	Probable 1-acyl-sn-glycerol-3-phosphate acyltransferase 4
SMil_00008955	-6.69066	3.81e-08	6.71e-07
SMil_00009017	5.25591	0.00300894	0.0156223
SMil_00009044	-2.67706	9.98e-14	4.54e-12	O65554.1	CBL-interacting serine/threonine-protein kinase 6
SMil_00009087	-2.7398	2.81e-12	9.98e-11
SMil_00009101	-4.95711	0.0117962	0.047837	Q8GY23.3	E3 ubiquitin-protein ligase UPL1; Short=Ubiquitin-protein ligase 1
SMil_00009102	-5.48292	0.000125139	0.00100949
SMil_00009117	2.34102	0.000842393	0.00528609	O49515.1	Ethylene-responsive transcription factor ERF091
SMil_00009150	-3.86644	0.00764359	0.0336348
SMil_00009168	-2.1886	3.39e-06	4.01e-05	P40691.1	Auxin-induced protein PCNT115
SMil_00009174	-2.1281	0.00711308	0.0318755	Q8RXC8.1	Receptor-like cytosolic serine/threonine-protein kinase RBK2
SMil_00009175	-2.50325	0.000477178	0.00324554
SMil_00009177	2.47592	3.09e-05	0.000290993	Q6R3L0.2	Metal-nicotianamine transporter YSL1
SMil_00009183	-2.35314	2.73e-28	5.22e-26
SMil_00009199	2.0681	1.99e-06	2.48e-05
SMil_00009207	-3.96778	7.86e-19	6.58e-17	Q06390.1	Methylated RNA-binding protein 1
SMil_00009224	5.28877	1.79e-07	2.74e-06
SMil_00009235	-2.02958	4.25e-07	6.07e-06	O22854.1	Electron transfer flavoprotein-ubiquinone oxidoreductase, mitochondrial; Short=ETF-QO; Short=ETF-ubiquinone oxidoreductase
SMil_00009297	6.11269	0.000118903	0.000964772	Q49SP5.1	Germacrene A synthase
SMil_00009341	-2.23854	0.00375193	0.0188124
SMil_00009410	-5.46653	0.00558643	0.0261947
SMil_00009415	-2.41485	3.17e-09	6.89e-08	Q9SUE3.2	Ethylene-responsive transcription factor CRF4
SMil_00009437	-6.64832	6.86e-06	7.59e-05	PF9331	Domain of unknown function (DUF1985)|PF02902
SMil_00009453	7.44896	2.93e-09	6.4e-08	Q5VPE3.1	Homeobox-leucine zipper protein HOX2
SMil_00009468	6.24915	2.2e-08	4.07e-07	Q8W1W9.1	Malonyl-coenzyme
SMil_00009509	-4.99575	0.0111992	0.0458481	Q9STE5.1	Putative disease resistance RPP13-like protein 2
SMil_00009510	-8.13221	1.82e-10	4.86e-09
SMil_00009511	3.26037	4.83e-06	5.53e-05	Q9MBG5.1	Probable calcium-binding protein CML30
SMil_00009536	-4.67808	0.00250972	0.0133939
SMil_00009555	5.94171	0.000378653	0.00265186
SMil_00009628	-6.70025	7.55e-06	8.28e-05
SMil_00009631	2.02509	7.24e-08	1.19e-06	PF7816	Protein of unknown function (DUF1645)
SMil_00009644	-7.41585	4.85e-07	6.88e-06
SMil_00009673	2.04433	0.0105585	0.0436958	Q84RR0.1	Probable E3 ubiquitin-protein ligase ARI7
SMil_00009688	4.61578	0.000920363	0.00568756
SMil_00009707	9.28281	4.11e-14	1.97e-12	PF3004	Plant transposase (Ptta/En/Spm family)
SMil_00009708	-9.44016	1.17e-14	5.99e-13
SMil_00009722	-4.25242	4.13e-19	3.53e-17	O65902.1	Cyclase-associated protein 1; Short=AtCAP1
SMil_00009766	5.36255	6.9e-18	5.07e-16
SMil_00009785	3.9005	2.37e-19	2.1e-17
SMil_00009823	-7.67331	1.18e-07	1.88e-06	P49062.1	Exopolygalacturonase clone GBGE184; Short=ExoPG
SMil_00009842	-3.14906	6.96e-16	4.16e-14	Q9SZG0.1	Heptahelical transmembrane protein 4
SMil_00009906	-2.45573	9.22e-08	1.49e-06	O82343.2	BTB/POZ domain-containing protein At2g46260
SMil_00009907	-2.98915	2.83e-05	0.000269909
SMil_00009916	-12.0473	1.07e-23	1.44e-21	P13508.1	Protein glp-1
SMil_00009919	7.3697	3.48e-08	6.2e-07
SMil_00009920	-3.08987	3.3e-60	3.86e-57	P23472.2	Hevamine-A
SMil_00009923	-5.12822	7.7e-20	7.36e-18
SMil_00009967	-7.97932	4.76e-25	7.11e-23	Q5Q995.1	Protein KRTCAP2 homolog
SMil_00010006	4.21645	1.85e-08	3.51e-07	Q9FI78.1	Shikimate O-hydroxycinnamoyltransferase
SMil_00010020	2.08765	1.72e-09	3.91e-08	Q9XFR5.1	Serine/arginine-rich splicing factor SR30; Short=At-SR30; Short=At-SRp30; Short=AtSR30
SMil_00010025	2.88496	9.06e-09	1.82e-07	Q9C5V5.2	Glutamate receptor 2.8
SMil_00010035	-5.84684	0.00024292	0.00179579	PF9412	Endoribonuclease XendoU
SMil_00010050	-8.03477	1.74e-07	2.68e-06	Q94JX5.1	LIM domain-containing protein WLIM1
SMil_00010131	4.10439	0.00258815	0.0137623
SMil_00010156	-6.48317	1.41e-05	0.000144128
SMil_00010157	5.98049	1.49e-27	2.75e-25
SMil_00010164	5.62785	1.78e-06	2.24e-05	O22286.1	BTB/POZ and MATH domain-containing protein 3
SMil_00010172	-2.3111	9.36e-06	0.000100268
SMil_00010175	-3.73559	3.73e-50	2.87e-47	Q58760.1	Uncharacterized protein MJ1365
SMil_00010202	-5.57674	5.12e-06	5.83e-05
SMil_00010206	5.38017	0.00263503	0.0139785
SMil_00010212	-2.27229	0.0088607	0.0379132
SMil_00010213	-4.72963	3.84e-10	9.82e-09
SMil_00010233	-7.39138	8.45e-08	1.38e-06
SMil_00010238	-7.37893	5.21e-07	7.35e-06	Q9STX9.1	Probable aquaporin TIP5-1
SMil_00010252	2.80278	1.56e-51	1.27e-48	P41127.1	60S ribosomal protein L13-1
SMil_00010265	3.60701	0.00636308	0.0291711
SMil_00010278	4.85769	0.0112605	0.0460602	P85524.1	Kirola
SMil_00010310	-5.76291	8.25e-05	0.000699646	O49840.1	Protein kinase 2B, chloroplastic
SMil_00010341	-4.45461	2.01e-11	6.22e-10	Q9FX89.2	Putative F-box protein At1g49610
SMil_00010344	-3.16116	0.00101654	0.006175
SMil_00010351	3.10229	2.72e-18	2.11e-16	Q9LD43.1	Acetyl-coenzyme A carboxylase carboxyl transferase subunit alpha, chloroplastic; Short=ACCase subunit alpha; Short=Acetyl-CoA carboxylase carboxyltransferase subunit alpha
SMil_00010352	4.09603	0.00227584	0.0122755
SMil_00010360	3.33385	8.66e-33	2.37e-30	PF3017	TNP1/EN/SPM transposase|PF03004
SMil_00010361	8.56711	6.97e-23	8.64e-21	Q9SFC7.1	F-box protein At3g07870
SMil_00010362	-2.31988	1.59e-06	2.03e-05	Q60CZ8.1	Putative late blight resistance protein homolog R1A-10 >Q6L438.2 RecName
SMil_00010503	2.99731	0.0080367	0.0350714
SMil_00010539	7.86009	1.42e-09	3.27e-08
SMil_00010624	-2.96303	2.93e-20	2.92e-18	Q9STS6.1	LOB domain-containing protein 27
SMil_00010627	6.63717	7.76e-06	8.49e-05
SMil_00010628	7.79527	2.19e-13	9.42e-12	PF5212	Protein of unknown function (DUF707)
SMil_00010631	-6.15222	8.53e-05	0.000719643
SMil_00010656	-4.97233	1.91e-18	1.52e-16
SMil_00010680	-3.99193	2.89e-10	7.48e-09	PF240	Ubiquitin family
SMil_00010689	6.70448	1.04e-05	0.000110274
SMil_00010698	10.6685	1.2e-18	9.72e-17
SMil_00010712	-3.0657	1.5e-15	8.53e-14	A2DZE8.1	Dolichyl-phosphate beta-glucosyltransferase ALG5A; Short=DolP-glucosyltransferase
SMil_00010820	-2.21984	0.000338115	0.00240711
SMil_00010827	-3.64165	5.87e-07	8.18e-06
SMil_00010838	6.10753	0.000107191	0.000879004	P84527.1	Kiwellin
SMil_00010840	-2.28073	0.00917535	0.0390312	Q9FL59.1	FT-interacting protein 1
SMil_00010846	-2.81069	0.0118463	0.048007	Q8GX86.2	Probable pectinesterase/pectinesterase inhibitor 21
SMil_00010855	-10.0524	7.61e-17	5.05e-15
SMil_00010856	-7.83991	9.26e-57	9.68e-54
SMil_00010866	-7.32807	0.000539452	0.0036079
SMil_00010945	2.32538	1.95e-14	9.73e-13	O23617.2	Alpha,alpha-trehalose-phosphate synthase [UDP-forming] 5
SMil_00010951	-5.36486	1.76e-08	3.33e-07	F4JSE7.1	Protein ENHANCED DISEASE RESISTANCE 2
SMil_00010998	5.11637	0.00582971	0.0271598
SMil_00011000	-3.31373	2.26e-26	3.73e-24
SMil_00011019	5.32483	0.000224519	0.00167456	O81788.1	WUSCHEL-related homeobox 13
SMil_00011021	2.24261	3.84e-05	0.0003538
SMil_00011035	-5.00039	9.96e-16	5.81e-14	O23379.2	Putative zinc finger protein CONSTANS-LIKE 11
SMil_00011040	-4.2161	0.0103479	0.0429457	O82598.1	Aquaporin TIP1-3
SMil_00011045	-2.87389	0.00392082	0.0195287	Q8W4G6.2	Cysteine-rich receptor-like protein kinase 15; Short=Cysteine-rich RLK15
SMil_00011061	6.52986	5.36e-07	7.53e-06	Q9SJA2.1	Probable xyloglucan glycosyltransferase 8
SMil_00011068	-6.19748	0.000274486	0.00200124
SMil_00011073	-6.8527	1.29e-18	1.04e-16	D7STK2.1	Glutamyl-tRNA(Gln) amidotransferase subunit C, chloroplastic/mitochondrial; Short=Glu-AdT subunit C
SMil_00011079	6.48139	3.62e-05	0.000335516
SMil_00011091	-7.70813	3.82e-07	5.54e-06
SMil_00011109	7.9004	1.08e-46	6.6e-44	O22149.2	Probable pectinesterase/pectinesterase inhibitor 17
SMil_00011131	3.10192	0.000139496	0.00110911	Q7XVA8.2	Putative ripening-related protein 1
SMil_00011200	-6.1197	2e-05	0.000198011
SMil_00011202	-4.53084	1.72e-09	3.9e-08	Q9FMU6.1	Mitochondrial phosphate carrier protein 3, mitochondrial
SMil_00011204	-2.55803	1.26e-07	1.99e-06	Q6YWQ4.1	Potassium transporter 25
SMil_00011222	-6.11356	5.52e-06	6.25e-05
SMil_00011248	4.35601	0.00831775	0.0360325
SMil_00011284	2.77196	8.95e-06	9.63e-05	P52410.2	3-oxoacyl-[acyl-carrier-protein] synthase I, chloroplastic
SMil_00011312	-3.46866	0.00367767	0.0184951	Q6AVI0.1	Zinc finger BED domain-containing protein RICESLEEPER 2
SMil_00011323	-6.06753	2.18e-05	0.0002142	O23492.1	Inositol transporter 4
SMil_00011370	-7.40058	1.51e-07	2.36e-06
SMil_00011400	-2.68533	1.95e-31	4.69e-29	Q9ZW85.1	3-isopropylmalate dehydratase small subunit 3
SMil_00011437	-2.50597	0.00143072	0.00829821	Q9LEQ3.1	Cyclic nucleotide-gated ion channel 18
SMil_00011451	-7.29818	3.56e-07	5.2e-06	PF13359	DDE superfamily endonuclease
SMil_00011454	-4.29514	0.0100479	0.0419995
SMil_00011460	3.15395	9.31e-45	4.78e-42
SMil_00011502	10.4252	3.92e-18	3e-16	Q6L400.1	Putative late blight resistance protein homolog R1B-16
SMil_00011530	-6.74794	1.02e-05	0.000108468	Q9SJE2.1	Palmitoyl-acyl carrier protein thioesterase, chloroplastic
SMil_00011546	-4.0752	3.61e-05	0.000335413	Q9ZUU9.2	ABC transporter G family member 3; Short=AtABCG3
SMil_00011598	-2.56264	5.25e-05	0.000467293	P57742.1	Probable prefoldin subunit 5
SMil_00011640	-6.12585	0.00598037	0.0277337
SMil_00011651	-7.17709	6.71e-10	1.64e-08
SMil_00011657	5.94221	0.000317392	0.00227954
SMil_00011661	-5.03694	1.94e-06	2.43e-05	Q6ZJM9.1	PHD finger protein EHD3
SMil_00011669	-4.78731	1.72e-06	2.18e-05	PF13976	GAG-pre-integrase domain
SMil_00011678	3.91221	5.11e-09	1.07e-07	Q60CZ8.1	Putative late blight resistance protein homolog R1A-10
SMil_00011681	-6.29797	3.12e-05	0.000294354
SMil_00011698	-4.42484	9.38e-12	3.08e-10
SMil_00011738	-3.42153	0.000561867	0.00373901	Q6PQJ9.1	3-oxo-Delta(4,5)-steroid 5-beta-reductase
SMil_00011759	5.615	1.42e-11	4.55e-10	P28427.1	Ribulose bisphosphate carboxylase large chain; Short=RuBisCO large subunit
SMil_00011807	2.88936	3.19e-05	0.000299139
SMil_00011837	2.18925	1.74e-06	2.2e-05
SMil_00011838	-5.50055	0.000985863	0.00601611
SMil_00011845	-2.54225	7.18e-09	1.47e-07	Q9FNP2.1	GDSL esterase/lipase At5g08460
SMil_00011891	-2.59378	2.84e-06	3.41e-05
SMil_00011892	-2.46725	3.92e-06	4.59e-05	Q9S7I6.1	LRR receptor-like serine/threonine-protein kinase RPK2
SMil_00011914	3.18242	4.44e-10	1.12e-08	Q9FIT2.2	Putative non-specific lipid-transfer protein 14; Short=LTP 14
SMil_00011927	-6.29253	0.000997071	0.00606932
SMil_00011928	6.69071	6.14e-06	6.88e-05	Q7XPK1.1	Zinc finger CCCH domain-containing protein 31; Short=OsC3H31
SMil_00011945	-2.12607	5.39e-07	7.57e-06	Q9FMC8.1	Transcription repressor OFP13
SMil_00011952	4.79996	2.93e-06	3.51e-05	C0LGP4.1	Probable LRR receptor-like serine/threonine-protein kinase At3g47570
SMil_00011963	-6.60884	5.38e-05	0.000476738	Q9SF32.1	Protein IQ-DOMAIN 1
SMil_00011994	6.25121	3.26e-05	0.000305322
SMil_00012019	2.01197	5.86e-06	6.6e-05	Q9CAL2.1	Cysteine-rich receptor-like protein kinase 3; Short=Cysteine-rich RLK3
SMil_00012168	-5.26578	1.2e-17	8.57e-16
SMil_00012192	2.4031	1.55e-05	0.000157478	PF5553	Cotton fibre expressed protein|PF14364
SMil_00012283	2.68128	1.08e-21	1.23e-19	Q52T38.1	Protein S-acyltransferase 24
SMil_00012294	-8.26025	5.6e-11	1.63e-09
SMil_00012303	5.41086	4.77e-06	5.46e-05
SMil_00012311	-8.61147	1.88e-30	4.19e-28
SMil_00012326	9.0036	3.32e-13	1.38e-11
SMil_00012360	-6.70321	9.29e-06	9.96e-05
SMil_00012371	-2.5991	0.00023687	0.00175683
SMil_00012403	2.4651	7.96e-07	1.08e-05	Q9SY55.3	Calcium-transporting ATPase 3, endoplasmic reticulum-type; Short=AtECA3
SMil_00012413	-7.40917	1.39e-05	0.000142768	PF6203	CCT motif
SMil_00012497	-4.01823	5.07e-11	1.48e-09	PF168	C2 domain
SMil_00012541	-3.22723	6.03e-50	4.53e-47	Q9SF40.1	60S ribosomal protein L4-1; Short=L1
SMil_00012549	-2.21485	0.00169942	0.00957585	Q9XF43.1	3-ketoacyl-CoA synthase 6; Short=KCS-6
SMil_00012604	2.61151	3.38e-05	0.000315085	Q6DBG8.1	Probable arabinosyltransferase ARAD1
SMil_00012689	-6.2894	4.72e-06	5.42e-05	Q3E8Z8.1	Putative pectinesterase/pectinesterase inhibitor 28
SMil_00012690	-9.74479	1.3e-06	1.69e-05	Q3E8Z8.1	Putative pectinesterase/pectinesterase inhibitor 28
SMil_00012692	-9.7032	1.49e-16	9.41e-15	Q3E8Z8.1	Putative pectinesterase/pectinesterase inhibitor 28
SMil_00012711	-5.4906	7.26e-11	2.07e-09
SMil_00012723	-5.8163	2.52e-17	1.75e-15
SMil_00012725	-2.15584	8.28e-06	8.99e-05	Q8IXU6.1	Solute carrier family 35 member F2
SMil_00012746	-6.49158	6.99e-06	7.72e-05
SMil_00012750	-3.35435	6.15e-38	2.28e-35	Q96303.1	Inorganic phosphate transporter 1-4; Short=AtPht1;4
SMil_00012760	6.07058	0.000169314	0.00130989	O82568.1	Choline/ethanolaminephosphotransferase 2
SMil_00012791	3.29363	0.000175908	0.00135624	Q9SA16.1	Protein PHLOEM PROTEIN 2-LIKE A9; Short=AtPP2-A9
SMil_00012795	3.01055	1.08e-08	2.14e-07	PF13359	DDE superfamily endonuclease
SMil_00012821	7.24707	1.1e-08	2.17e-07
SMil_00012848	-3.56167	8.95e-06	9.63e-05
SMil_00012855	-3.74403	8.57e-18	6.24e-16
SMil_00012891	3.0982	4.15e-05	0.000379077	E2E2N7.1	Bicyclogermacrene synthase; Short=Ovtps4
SMil_00012895	5.38587	2.39e-10	6.27e-09
SMil_00012898	-2.37177	1.43e-07	2.24e-06	Q7XA06.1	Synaptotagmin-3
SMil_00012903	2.26352	0.00333276	0.0170108	Q8GXW1.2	DELLA protein RGL2
SMil_00012908	7.03957	8.15e-46	4.5e-43	Q8VZC0.1	UDP-glucuronic acid decarboxylase 1
SMil_00012914	4.28075	0.00104239	0.00631631
SMil_00012980	-2.02105	8.71e-07	1.18e-05	P27061.1	Acid phosphatase 1
SMil_00012988	-5.54285	0.00522777	0.0247695	Q9LT24.1	BTB/POZ domain-containing protein At3g19850
SMil_00013023	-2.16439	3.83e-12	1.33e-10	Q9CX30.2	Protein YIF1B
SMil_00013031	6.62155	9.68e-06	0.000103332
SMil_00013032	-2.88244	1.88e-16	1.17e-14	Q5PP26.1	Piriformospora indica-insensitive protein 2
SMil_00013034	-6.80442	9.65e-07	1.29e-05
SMil_00013056	3.36952	1.99e-06	2.48e-05
SMil_00013057	-2.59212	1.4e-47	9.32e-45	O82531.1	Proteasome subunit beta type-1
SMil_00013059	7.47196	5.72e-08	9.66e-07
SMil_00013078	4.27421	1.24e-10	3.41e-09
SMil_00013080	2.5876	0.00116952	0.00697825	Q6TXD2.1	Pelargonidin 3-O-(6-caffeoylglucoside) 5-O-(6-O-malonylglucoside) 4'''-malonyltransferase
SMil_00013082	5.44948	0.00129208	0.00760218	D4N502.1	Codeine O-demethylase
SMil_00013086	-3.80283	4.94e-08	8.5e-07	PF4842	Plant protein of unknown function (DUF639)
SMil_00013097	-4.60788	0.00471438	0.022772	PF1925	Sulfite exporter TauE/SafE
SMil_00013121	-2.61854	5.57e-05	0.00049102
SMil_00013143	-2.58281	0.0103355	0.042906
SMil_00013168	-4.24278	0.0001466	0.00115554	Q40161.1	Polygalacturonase-1 non-catalytic subunit beta
SMil_00013189	-3.13004	1.31e-06	1.71e-05	Q8LDV3.2	Uncharacterized protein At4g13200, chloroplastic
SMil_00013273	2.09962	2.93e-06	3.51e-05	F4K0C4.1	Trafficking protein particle complex II-specific subunit 130 homolog; Short=AtTRS130; Short=TRAPP II-specific subunit 130 homolog
SMil_00013287	-8.03002	8.43e-08	1.38e-06	Q54KI0.1	Eukaryotic translation initiation factor 3 subunit J; Short=eIF3j
SMil_00013332	-3.36933	0.00015805	0.00123383	Q9SVQ1.1	Indole-3-pyruvate monooxygenase YUCCA2
SMil_00013364	-2.00608	7.94e-05	0.000676303
SMil_00013391	-2.58464	0.0113317	0.0463062
SMil_00013408	-4.32421	1.78e-05	0.000178194
SMil_00013411	6.65017	8.09e-06	8.81e-05	PF13359	DDE superfamily endonuclease
SMil_00013421	-7.02872	0.000867262	0.00541544	O82245.1	Translocator protein homolog; Short=AtTSPO
SMil_00013435	-6.48827	4.97e-05	0.00044465
SMil_00013481	-2.73932	1.73e-06	2.19e-05	Q9VTY4.1	KxDL motif-containing protein CG10681
SMil_00013543	-2.69668	0.00195132	0.0107835	Q9XIF0.1	Putative disease resistance protein At1g59780
SMil_00013560	7.65314	4.43e-09	9.38e-08	Q42596.1	Thionin-2.1; Contains
SMil_00013579	-3.80737	0.00721084	0.0322051
SMil_00013636	-5.21134	2.14e-05	0.000210722	Q945B6.1	Probable 2-oxoglutarate-dependent dioxygenase AOP1.2
SMil_00013648	5.31895	0.00278519	0.0146424	Q851M9.1	Ammonium transporter 3 member 2; Short=OsAMT3
SMil_00013650	10.4957	2.6e-18	2.04e-16
SMil_00013672	6.18325	3.56e-05	0.000330881
SMil_00013701	2.36171	4.16e-40	1.72e-37	Q8W496.1	Protochlorophyllide-dependent translocon component 52, chloroplastic
SMil_00013718	-6.4951	7.99e-06	8.71e-05
SMil_00013721	7.30813	4.84e-08	8.34e-07
SMil_00013731	-5.91466	0.00149394	0.00859604	P13744.1	11S globulin subunit beta; Contains
SMil_00013756	-6.37194	0.000169569	0.00131151	O81916.2	Uncharacterized calcium-binding protein At1g02270
SMil_00013775	2.5284	4.91e-10	1.22e-08	Q52T38.1	Protein S-acyltransferase 24
SMil_00013814	2.81802	0.000165196	0.00128108
SMil_00013840	2.46718	5.9e-08	9.93e-07	Q8RXX9.2	E3 ubiquitin-protein ligase ATL6
SMil_00013860	2.18195	3.1e-09	6.75e-08	Q6XBF8.1	Aspartic proteinase CDR1
SMil_00013872	-2.31364	0.00527887	0.024955
SMil_00013910	-2.63495	1.14e-10	3.13e-09
SMil_00013923	-2.92878	9.8e-29	1.9e-26
SMil_00013935	2.48731	5.95e-09	1.23e-07	Q9SU64.1	Probable cyclic nucleotide-gated ion channel 16
SMil_00014010	-6.23325	6.29e-05	0.000548389
SMil_00014011	3.32144	0.00672924	0.0304538
SMil_00014013	-2.06315	0.00188089	0.0104694	A2DZE8.1	Dolichyl-phosphate beta-glucosyltransferase ALG5A; Short=DolP-glucosyltransferase
SMil_00014024	5.11847	6.09e-07	8.47e-06
SMil_00014061	9.40971	1.51e-14	7.64e-13
SMil_00014071	7.18521	1.34e-08	2.63e-07
SMil_00014119	-2.6941	2.5e-15	1.4e-13
SMil_00014121	-2.86968	0.00158913	0.00906083
SMil_00014129	-6.65909	1.86e-22	2.25e-20	P82859.1	Agglutinin
SMil_00014162	-8.37663	2.93e-10	7.58e-09
SMil_00014204	-6.09482	0.00734416	0.032656
SMil_00014240	4.21137	3.59e-12	1.26e-10
SMil_00014257	-3.90705	1.69e-08	3.23e-07	PF8241	Methyltransferase domain
SMil_00014266	-6.10961	0.000141997	0.00112446	PF6839	GRF zinc finger
SMil_00014277	8.56412	7.13e-12	2.38e-10	P52410.2	3-oxoacyl-[acyl-carrier-protein] synthase I, chloroplastic
SMil_00014279	-8.95694	3.09e-05	0.000290993	Q9SQ57.1	Peroxygenase
SMil_00014290	8.54833	2.92e-11	8.87e-10	Q5N863.1	Beta-glucosidase 4; Short=Os1bglu4
SMil_00014320	3.40446	2.74e-06	3.29e-05
SMil_00014346	-6.59902	9.01e-06	9.69e-05	PF1925	Sulfite exporter TauE/SafE
SMil_00014350	-5.87762	0.000703608	0.0045318
SMil_00014362	4.22404	0.0101708	0.0423728
SMil_00014380	-7.14603	4.35e-11	1.29e-09	Q94AH9.2	Mediator of RNA polymerase II transcription subunit 36a
SMil_00014383	-2.05521	0.000729971	0.0046728	PF8646	Replication factor-A C terminal domain
SMil_00014407	4.07646	0.000287868	0.00208747
SMil_00014424	2.45077	0.000404299	0.00281048
SMil_00014427	3.16779	6.88e-08	1.14e-06
SMil_00014430	-2.15479	0.000664429	0.0043213	Q9FZ42.1	Glucose and ribitol dehydrogenase homolog 1
SMil_00014433	-6.09166	8.72e-11	2.46e-09	Q9T071.1	Probable hexokinase-like 2 protein
SMil_00014444	7.22133	7.34e-08	1.21e-06	PF13855	Leucine rich repeat
SMil_00014462	2.30702	3.65e-08	6.46e-07	Q9SB81.2	Peroxidase 42; Short=Atperox P42
SMil_00014470	-6.08281	0.000136696	0.00109011
SMil_00014492	-5.24093	6.19e-06	6.93e-05	Q00624.1	L-ascorbate oxidase homolog
SMil_00014541	-2.73506	7.94e-27	1.39e-24
SMil_00014575	-6.07023	1.03e-05	0.000109159	Q1PE04.1	F-box/LRR-repeat protein 25
SMil_00014579	-2.98739	2.74e-08	4.97e-07
SMil_00014601	-5.32936	0.00332194	0.0169793	Q8L7S0.3	Probable ubiquitin-like-specific protease 2B
SMil_00014665	7.6047	3.89e-92	1.42e-88
SMil_00014668	8.86436	1.53e-12	5.72e-11
SMil_00014685	-2.63395	0.000685521	0.00443973	PF5834	Lycopene cyclase protein
SMil_00014687	-8.15695	1.39e-10	3.78e-09
SMil_00014688	6.11764	0.000134698	0.00107711
SMil_00014697	2.85985	0.00977264	0.0411534
SMil_00014698	-3.16216	0.00034668	0.00246209	PF5686	Glycosyl transferase family 90
SMil_00014699	-5.08492	3.43e-26	5.58e-24	Q9LQ81.1	Actin-depolymerizing factor 10; Short=ADF-10; Short=AtADF10
SMil_00014732	3.5979	0.000770888	0.00489512
SMil_00014753	-4.9728	0.00765409	0.0336658	Q9FWA3.1	6-phosphogluconate dehydrogenase, decarboxylating 3
SMil_00014764	5.02878	0.00757671	0.033436
SMil_00014770	-2.4661	8.75e-05	0.000737497
SMil_00014804	-3.73709	4.19e-05	0.000382104	A1CX14.1	Probable endo-1,4-beta-xylanase C; Short=Xylanase C
SMil_00014816	-3.5242	1.37e-09	3.16e-08	PF10536	Plant mobile domain
SMil_00014848	-3.68364	5.17e-16	3.11e-14	Q05431.2	L-ascorbate peroxidase 1, cytosolic; Short=AtAPx01
SMil_00014873	-4.08825	3.69e-06	4.35e-05	PF12776	Myb/SANT-like DNA-binding domain
SMil_00014886	-2.36307	8.56e-16	5.02e-14
SMil_00014911	4.31698	7.83e-05	0.000667107
SMil_00014929	-4.09213	3.29e-33	9.54e-31	Q3E9A4.3	Probable glycosyltransferase At5g20260
SMil_00014932	4.11112	1.89e-30	4.19e-28	Q03730.1	Uncharacterized vacuolar membrane protein YML018C
SMil_00014933	2.08639	3.52e-33	1.01e-30	Q5XEZ1.1	Hydroxyproline O-galactosyltransferase HPGT3
SMil_00014935	-5.09044	0.00530201	0.0250442	PF12776	Myb/SANT-like DNA-binding domain
SMil_00014948	-5.64903	0.000708238	0.00455461	Q8W575.2	COP9 signalosome complex subunit 3; Short=Signalosome subunit 3
SMil_00014982	-7.5658	1.55e-06	2e-05	PF12776	Myb/SANT-like DNA-binding domain|PF13359
SMil_00015006	-10.8088	2.13e-19	1.9e-17
SMil_00015036	7.02003	1.66e-06	2.12e-05
SMil_00015062	-5.61408	0.000685356	0.00443964
SMil_00015090	-2.61965	0.00488952	0.0234747	F4I114.1	Probable serine/threonine-protein kinase At1g09600
SMil_00015102	-4.10476	5.33e-09	1.12e-07	P49173.1	Probable aquaporin NIP-type
SMil_00015107	-2.43117	7.38e-36	2.45e-33	Q9CAH1.1	Putative receptor-like protein kinase At1g72540
SMil_00015132	-5.16654	0.0085889	0.0369664
SMil_00015166	2.33083	0.00777472	0.0341092	Q5ZHZ4.1	E3 ubiquitin-protein ligase Hakai
SMil_00015176	6.65097	7.42e-06	8.15e-05
SMil_00015178	-3.48358	0.00651822	0.029724
SMil_00015185	9.25276	5.35e-14	2.54e-12
SMil_00015193	7.96173	4.72e-10	1.18e-08
SMil_00015225	-2.52876	0.00282843	0.0148324	P93835.2	Dehydration-responsive element-binding protein 1B; Short=Protein DREB1B
SMil_00015270	-6.50651	1.36e-05	0.000139707	PF13456	Reverse transcriptase-like
SMil_00015311	7.1134	2.78e-51	2.2e-48	Q8VWF8.2	DNA-directed RNA polymerase 2, chloroplastic/mitochondrial
SMil_00015316	4.52799	3.76e-08	6.64e-07	Q9C7S5.1	Tyrosine-sulfated glycopeptide receptor 1
SMil_00015318	-3.42254	8.03e-05	0.000681978	Q5JNT2.1	Acyl transferase 4; Short=OsAT4
SMil_00015320	-4.21364	0.00225632	0.0121972	Q18B61.1	N utilization substance protein B homolog; Short=Protein NusB
SMil_00015332	-4.31825	0.000183746	0.00140446
SMil_00015377	3.46608	3.02e-05	0.000285851	Q949P2.1	Probable cytosolic oligopeptidase A
SMil_00015393	7.79415	1.8e-09	4.06e-08
SMil_00015395	3.75041	1.37e-08	2.66e-07	Q9CAR0.1	NAC transcription factor 32
SMil_00015420	-2.12525	1.44e-05	0.000147103
SMil_00015430	-5.93485	4.36e-07	6.22e-06	Q9SA25.1	Wall-associated receptor kinase-like 8
SMil_00015457	10.7012	4.66e-19	3.97e-17
SMil_00015496	5.39508	0.00286405	0.014981
SMil_00015497	-6.36355	0.00591101	0.0274905	Q9ZVY7.1	Oil body-associated protein 1A
SMil_00015550	-4.52127	1.09e-12	4.2e-11
SMil_00015554	2.58564	0.00639352	0.029271	Q84TG3.1	E3 ubiquitin-protein ligase PUB23
SMil_00015557	7.24131	5.22e-67	7.64e-64
SMil_00015559	-5.5163	0.000164479	0.00127653
SMil_00015580	3.51598	9.67e-15	5.05e-13	Q9LIN3.1	Glycine-rich RNA-binding protein RZ1A; Short=AtRZ-1a
SMil_00015592	4.12707	0.00029325	0.00212124	Q9C6K9.1	LEAF RUST 10 DISEASE-RESISTANCE LOCUS RECEPTOR-LIKE PROTEIN KINASE-like 1.1
SMil_00015600	-2.92416	0.000499158	0.0033809	Q8LGG8.2	Universal stress protein A-like protein
SMil_00015608	-5.19096	0.00789305	0.034561	Q9C5X8.1	Molybdenum cofactor sulfurase; Short=MoCo sulfurase
SMil_00015610	7.32224	1.31e-07	2.06e-06
SMil_00015622	6.67544	4.12e-06	4.81e-05
SMil_00015631	7.47578	1.49e-08	2.88e-07
SMil_00015643	-2.24297	0.00173118	0.00973069
SMil_00015666	-7.15642	7.19e-07	9.91e-06
SMil_00015691	-7.81464	8.46e-09	1.71e-07
SMil_00015695	-5.38949	0.00197061	0.0108757
SMil_00015701	-2.70971	0.00414744	0.0204657	Q8H1U4.1	Anaphase-promoting complex subunit 5
SMil_00015704	-9.76671	3.41e-15	1.88e-13	P21616.4	Pyrophosphate-energized vacuolar membrane proton pump
SMil_00015707	-2.17095	0.00490618	0.0235431
SMil_00015746	5.64967	0.000115803	0.000943021
SMil_00015751	-3.31343	5.75e-23	7.25e-21
SMil_00015785	2.96611	9.94e-15	5.18e-13	B3H5Q1.2	Beta-glucosidase 11; Short=AtBGLU11
SMil_00015787	4.61913	1.97e-07	3e-06	B8B5U8.1	Probable E3 ubiquitin-protein ligase BAH1-like 1
SMil_00015795	-4.55096	1.06e-09	2.51e-08
SMil_00015796	3.53087	9.78e-07	1.31e-05
SMil_00015797	-3.34549	0.0039219	0.0195307	PF3108	MuDR family transposase|PF04434
SMil_00015809	-9.04478	6.87e-13	2.7e-11
SMil_00015815	-2.50958	9.14e-07	1.23e-05
SMil_00015821	-2.59431	7.43e-10	1.8e-08
SMil_00015823	2.20055	4.41e-11	1.3e-09
SMil_00015825	3.78567	8.55e-15	4.48e-13
SMil_00015828	-3.45293	8.71e-11	2.46e-09
SMil_00015881	3.76513	8.43e-19	6.97e-17	Q0VC80.1	YrdC domain-containing protein, mitochondrial
SMil_00015887	-3.41352	2.33e-05	0.000227123	Q9M8D3.3	Probable phosphoribosylformylglycinamidine synthase, chloroplastic/mitochondrial; Short=FGAM synthase; Short=FGAMS
SMil_00015890	2.61664	0.00473063	0.0228278
SMil_00015904	-3.98783	1.64e-30	3.69e-28	PF13456	Reverse transcriptase-like
SMil_00015916	7.19762	5.37e-07	7.55e-06
SMil_00015982	-9.07691	8.14e-05	0.000690929	PF13359	DDE superfamily endonuclease
SMil_00015986	5.91397	0.000264794	0.00193743
SMil_00015997	-3.7436	0.0110988	0.0455198
SMil_00016004	-2.78534	8.4e-06	9.11e-05
SMil_00016021	8.33198	4.25e-11	1.26e-09
SMil_00016054	3.2713	0.00166317	0.00940644
SMil_00016087	2.08307	3.43e-09	7.39e-08
SMil_00016126	-2.47631	0.00106837	0.00644745	PF3168	Late embryogenesis abundant protein
SMil_00016132	6.83789	1.23e-06	1.62e-05
SMil_00016140	-6.80812	1.13e-06	1.49e-05	P48279.1	Uncharacterized protein ycf39
SMil_00016213	-3.77561	0.000131275	0.00105174	Q9SND9.1	Uncharacterized acetyltransferase At3g50280
SMil_00016218	5.19003	0.004787	0.0230581	Q94KT8.1	Protein COBRA
SMil_00016227	-6.0553	0.00625169	0.0287641	PF13963	Transposase-associated domain|PF13952
SMil_00016228	7.02145	7.93e-11	2.26e-09	Q9ZPR4.1	Magnesium transporter MRS2-5
SMil_00016233	-7.73047	1.36e-05	0.000140276
SMil_00016238	-6.86622	1.82e-06	2.29e-05
SMil_00016242	-4.71557	2.45e-06	2.98e-05	Q9CAR3.1	SNF1-related protein kinase regulatory subunit gamma-1-like
SMil_00016250	-4.08329	0.00297549	0.0154729
SMil_00016280	-3.39371	0.00486599	0.0233809	A0LQM1.1	Dual-specificity RNA methyltransferase RlmN
SMil_00016281	-2.4231	1.59e-06	2.04e-05	PF3004	Plant transposase (Ptta/En/Spm family)
SMil_00016310	9.06749	1.65e-13	7.27e-12	Q9SFF9.1	Germin-like protein subfamily 1 member 7
SMil_00016330	9.59987	4.89e-15	2.64e-13
SMil_00016348	-6.24384	2.47e-05	0.00023886
SMil_00016359	-5.77032	0.00036585	0.00257574
SMil_00016387	2.62671	3.79e-19	3.28e-17	Q05091.1	Polygalacturonase inhibitor
SMil_00016393	5.02937	0.00600803	0.0278443	Q9STE7.1	Putative disease resistance RPP13-like protein 3
SMil_00016468	3.57115	1.15e-08	2.26e-07
SMil_00016469	2.93025	2.77e-09	6.09e-08
SMil_00016491	9.99407	1.22e-16	7.75e-15
SMil_00016511	-2.3214	0.00607668	0.0281002	F4JQZ3.2	Rho GTPase-activating protein REN1
SMil_00016558	9.2521	1.28e-13	5.71e-12
SMil_00016559	-4.00551	4.05e-14	1.94e-12	P29357.3	Chloroplast envelope membrane 70 kDa heat shock-related protein
SMil_00016635	-7.37109	5.77e-08	9.74e-07
SMil_00016645	-8.15312	1.85e-10	4.94e-09
SMil_00016648	2.27839	0.00010776	0.00088342	Q40479.1	Ethylene-responsive transcription factor 2; Short=NtERF2
SMil_00016713	-12.5303	2.34e-25	3.6e-23
SMil_00016732	-9.13653	2.54e-13	1.07e-11
SMil_00016751	-3.41973	0.0065996	0.0300343	Q9ZUU8.1	SNF1-related protein kinase regulatory subunit beta-3; Short=AKIN subunit beta-3; Short=AKINB3; Short=AKINbeta3
SMil_00016826	-4.96962	0.00105354	0.00637722	Q9MB14.2	Polyphenol oxidase II, chloroplastic; Short=PPO-II
SMil_00016878	-2.57524	1.43e-10	3.88e-09	O23051.1	Ent-kaurenoic acid oxidase 1; Short=AtKAO1
SMil_00016885	-8.436	4.92e-15	2.65e-13
SMil_00016926	7.81472	1.79e-09	4.04e-08	Q9M223.1	Probable U3 small nucleolar RNA-associated protein 11; Short=U3 snoRNA-associated protein 11
SMil_00016936	-4.41574	1.51e-12	5.66e-11	O24542.1	Auxin-induced protein 22D
SMil_00016950	-2.29497	0.00573977	0.026792
SMil_00016982	-3.50449	1.02e-24	1.46e-22	P50906.2	Translationally-controlled tumor protein homolog; Short=TCTP
SMil_00017019	9.02212	2.36e-13	9.99e-12	Q6Z4H0.1	Probable 6-phosphogluconolactonase 2; Short=6PGL 2 >A2YNH4.1 RecName
SMil_00017025	-5.36896	5.17e-12	1.76e-10	Q9FSF0.1	Malate dehydrogenase; Short=NtRed-2
SMil_00017038	-5.39015	9.56e-06	0.000102177
SMil_00017048	-4.74232	2.55e-12	9.18e-11	P82192.2	50S ribosomal protein L5, chloroplastic
SMil_00017134	-4.22792	9.51e-47	5.92e-44	Q9SK27.2	Early nodulin-like protein 1
SMil_00017140	-2.68348	1.19e-06	1.57e-05
SMil_00017186	-5.89277	0.000176946	0.00136281
SMil_00017193	2.40852	1.13e-16	7.21e-15
SMil_00017202	-7.35635	0.000123417	0.000997524	Q52K82.1	Probable calcium-binding protein CML21
SMil_00017230	-4.73863	0.00222466	0.0120595
SMil_00017238	-2.29805	1.53e-07	2.38e-06	Q8LF21.2	Dynamin-related protein 1C
SMil_00017244	2.99582	9.87e-21	1.02e-18	O64495.1	Subtilisin-like protease SBT1.2
SMil_00017262	-2.05499	0.000426986	0.00294764
SMil_00017293	-8.97364	6.53e-13	2.58e-11	P49730.1	Ribonucleoside-diphosphate reductase small chain
SMil_00017296	2.56795	1.9e-09	4.27e-08
SMil_00017373	-5.17685	0.0105027	0.043514
SMil_00017387	-3.65467	0.0042372	0.0208175	Q9SS03.1	Dirigent protein 21; Short=AtDIR21
SMil_00017388	-6.3952	0.00558674	0.0261947	Q9FI66.1	Dirigent protein 3; Short=AtDIR3
SMil_00017404	-2.92628	1.55e-05	0.000157427	O81832.4	G-type lectin S-receptor-like serine/threonine-protein kinase At4g27290
SMil_00017411	3.46928	5.96e-05	0.00052182	P92995.2	Germin-like protein subfamily T member 1
SMil_00017496	-2.85695	1.14e-18	9.33e-17	Q8LE10.2	HVA22-like protein i; Short=AtHVA22i
SMil_00017497	-6.30927	4.1e-05	0.00037501
SMil_00017537	-3.9925	0.00466259	0.0225628	Q9SF32.1	Protein IQ-DOMAIN 1
SMil_00017573	4.22709	0.01165	0.0473753
SMil_00017575	3.86578	8.9e-10	2.13e-08	U3U992.1	7-deoxyloganetic acid glucosyltransferase
SMil_00017632	-6.02054	0.00762467	0.0335805
SMil_00017637	-8.24969	2.38e-10	6.26e-09
SMil_00017675	-4.95791	0.00979736	0.0412179	F4I4B6.1	Exocyst complex component EXO84A; Short=AtExo80a
SMil_00017685	-6.99435	7.89e-07	1.08e-05
SMil_00017743	-2.86473	0.00650334	0.0296932	Q9LF97.1	CBS domain-containing protein CBSCBSPB3
SMil_00017747	-3.70636	7.81e-14	3.62e-12	Q9ZV94.1	Putative F-box/FBD/LRR-repeat protein At1g78760
SMil_00017762	6.19366	4.51e-08	7.83e-07
SMil_00017771	-5.68348	0.00130529	0.00766019	Q9C8Z4.3	Uncharacterized protein At3g06530
SMil_00017778	-3.91468	2.23e-05	0.000218253
SMil_00017780	5.26155	2.9e-41	1.25e-38	Q0WT48.1	DnaJ protein ERDJ2A
SMil_00017791	-2.33542	0.000310907	0.00223845	Q0WMZ5.1	Outer envelope pore protein 16-2, chloroplastic
SMil_00017795	5.32297	2.69e-18	2.09e-16
SMil_00017797	-7.25992	5.26e-08	8.98e-07
SMil_00017808	8.55343	2.25e-12	8.15e-11
SMil_00017834	7.87508	9.64e-10	2.28e-08
SMil_00017838	-3.54725	1.08e-10	2.97e-09	O22759.2	Protein indeterminate-domain 12
SMil_00017905	-8.55915	6.4e-12	2.14e-10	PF4434	SWIM zinc finger|PF10551
SMil_00017919	-5.73425	3.2e-26	5.23e-24	A5PK19.1	Methyltransferase-like protein 13
SMil_00017920	-9.57264	5.47e-15	2.94e-13
SMil_00017930	-2.42798	8.78e-10	2.1e-08	PF13456	Reverse transcriptase-like
SMil_00017980	-3.57378	0.00132905	0.00777789
SMil_00018019	-2.84314	2.59e-05	0.000249021	PF5699	hAT family C-terminal dimerisation region|PF04937
SMil_00018037	-5.62195	0.00406821	0.0201429	P52409.1	Glucan endo-1,3-beta-glucosidase
SMil_00018042	-5.81172	0.000312928	0.00225134	PF13883	Pyridoxamine 5'-phosphate oxidase
SMil_00018055	-8.22211	3.2e-08	5.72e-07
SMil_00018174	2.19292	1.91e-12	7.04e-11
SMil_00018176	-3.79352	3.33e-07	4.91e-06	Q9FZ95.1	Purine permease 3; Short=AtPUP3
SMil_00018180	-4.79912	1.26e-11	4.07e-10	Q9C8Y8.1	Putative F-box/FBD/LRR-repeat protein At1g66290
SMil_00018246	-2.29089	0.00518962	0.0246246	B3H4F1.1	Protein SPIRAL1-like 1
SMil_00018249	-4.34667	2.78e-20	2.8e-18
SMil_00018263	-3.47792	0.000307227	0.0022136	PF3004	Plant transposase (Ptta/En/Spm family)
SMil_00018270	7.14881	1.14e-07	1.83e-06
SMil_00018289	-2.67461	0.000400427	0.00278633	Q9C942.1	Caffeoylshikimate esterase
SMil_00018292	-2.83358	0.0117951	0.047837	PF13855	Leucine rich repeat
SMil_00018294	-2.94858	6.38e-08	1.07e-06
SMil_00018302	-2.18678	0.00127269	0.00750509	O80919.2	Protein trichome birefringence-like 34
SMil_00018346	-2.2259	2.9e-05	0.000275218	O04111.1	Chalcone synthase
SMil_00018359	-2.80269	0.00268511	0.0142004
SMil_00018418	-3.11627	0.00105569	0.00638893	Q8L817.1	Alpha carbonic anhydrase 7; Short=AtaCA7; Short=AtalphaCA7
SMil_00018451	2.2766	0.00284347	0.0149006	PF13359	DDE superfamily endonuclease|PF12776
SMil_00018478	6.1145	0.000342129	0.00243379	PF2902	Ulp1 protease family, C-terminal catalytic domain
SMil_00018490	2.54419	3.21e-09	6.96e-08
SMil_00018503	7.41734	1.92e-08	3.63e-07
SMil_00018504	-2.06613	2.37e-06	2.9e-05	Q9SX78.1	Probable carboxylesterase 2
SMil_00018505	-3.29408	7.13e-16	4.24e-14	Q9LYW0.1	BTB/POZ domain-containing protein At5g03250
SMil_00018507	-7.24213	6.51e-08	1.08e-06
SMil_00018543	-6.4224	2.28e-05	0.000222611
SMil_00018548	-2.76238	0.000155561	0.00121896	P33081.1	Auxin-induced protein 15A
SMil_00018569	6.7813	9.1e-10	2.17e-08	PF3283	Pectinacetylesterase
SMil_00018607	8.00292	4.36e-10	1.1e-08
SMil_00018611	-2.34627	0.000141885	0.00112413	Q39214.1	Disease resistance protein RPM1
SMil_00018612	7.28224	1.28e-05	0.000132187	Q9CAC1.1	Endoglucanase 8
SMil_00018674	2.737	2.03e-05	0.00020029	Q9XID3.1	G-type lectin S-receptor-like serine/threonine-protein kinase At1g34300
SMil_00018678	-2.87444	5.04e-10	1.25e-08
SMil_00018700	-4.71449	0.000200796	0.00151892
SMil_00018733	-2.83448	2.15e-07	3.26e-06	Q9SC14.1	Deoxyhypusine synthase; Short=DHS
SMil_00018735	-7.43337	9.11e-08	1.48e-06
SMil_00018741	4.40674	9.68e-05	0.000804904
SMil_00018752	4.81669	2.64e-06	3.18e-05
SMil_00018782	3.4715	1.53e-43	7.23e-41
SMil_00018830	2.31328	0.00130891	0.0076785
SMil_00018837	-6.80929	1.24e-06	1.62e-05	Q42877.1	DNA-directed RNA polymerase II subunit RPB2; Short=RNA polymerase II subunit 2; Short=RNA polymerase II subunit B2
SMil_00018840	-4.31861	6.72e-26	1.07e-23
SMil_00018843	-2.38563	7.14e-09	1.46e-07	Q9FJW6.2	Pentatricopeptide repeat-containing protein At5g67570, chloroplastic
SMil_00018850	-6.78251	2.05e-06	2.54e-05
SMil_00018883	-6.6161	1.03e-19	9.54e-18	PF5056	Protein of unknown function (DUF674)
SMil_00018906	5.38446	0.00158425	0.00904177
SMil_00018913	2.13823	2.08e-06	2.57e-05
SMil_00018927	-5.46653	0.00558643	0.0261947
SMil_00018941	4.94619	0.00921567	0.03918
SMil_00018986	-2.26425	3.35e-17	2.29e-15	P48624.1	Acyl-lipid omega-3 desaturase (cytochrome b5), endoplasmic reticulum
SMil_00019005	4.78932	1.29e-20	1.31e-18	Q9SJM3.1	Serine/threonine-protein kinase KIPK2
SMil_00019020	-8.72199	6.37e-07	8.84e-06	P46266.1	14-3-3-like protein
SMil_00019050	-9.40798	2.37e-14	1.17e-12
SMil_00019057	-6.34097	2.09e-06	2.58e-05	Q9SL02.2	DNA repair protein RAD50; Short=AtRAD50
SMil_00019085	3.33973	0.00125683	0.00743251	Q8L799.1	Inositol oxygenase 1
SMil_00019087	2.64006	0.00874663	0.0375074
SMil_00019125	2.51943	0.00149411	0.00859604	Q9SJE2.1	Palmitoyl-acyl carrier protein thioesterase, chloroplastic
SMil_00019126	3.28753	0.000226591	0.0016883	Q9FED2.1	HVA22-like protein e; Short=AtHVA22e
SMil_00019148	-2.3314	0.00115197	0.00689038
SMil_00019175	4.809	8.22e-19	6.83e-17
SMil_00019218	2.03481	2.46e-05	0.000238267	O82248.1	Nuclear transcription factor Y subunit B-5; Short=AtNF-YB-5
SMil_00019251	-5.8114	0.000611309	0.0040223
SMil_00019252	-3.60227	0.00352848	0.0178479
SMil_00019259	4.71928	1.97e-06	2.45e-05	Q945B6.1	Probable 2-oxoglutarate-dependent dioxygenase AOP1.2
SMil_00019294	-3.84852	1.21e-13	5.45e-12
SMil_00019301	-2.68918	0.000146552	0.00115554	Q9SHJ5.1	Glycerol-3-phosphate acyltransferase 1; Short=AtGPAT1
SMil_00019387	7.56065	1.7e-08	3.24e-07
SMil_00019470	5.25638	0.00252942	0.0134842	Q7X8C5.1	Wall-associated receptor kinase-like 2
SMil_00019477	-2.31152	0.00236831	0.0127087
SMil_00019516	-8.09336	1.94e-10	5.18e-09
SMil_00019526	-3.33485	4.23e-08	7.38e-07	F4KDN0.1	KH domain-containing protein HEN4
SMil_00019544	7.94717	9.63e-10	2.28e-08	PF5699	hAT family C-terminal dimerisation region
SMil_00019552	-5.56836	0.00127486	0.0075164
SMil_00019557	-4.48702	4.75e-06	5.46e-05
SMil_00019578	-4.82473	4.02e-08	7.03e-07
SMil_00019582	7.84227	1.33e-09	3.06e-08
SMil_00019616	-6.30612	4.53e-10	1.14e-08	Q94I55.1	Probable dolichyl-diphosphooligosaccharide--protein glycosyltransferase subunit 3
SMil_00019617	2.28663	9.86e-06	0.000104964	Q9M0Y9.1	CRIB domain-containing protein RIC10
SMil_00019618	-3.98656	0.000582385	0.00385713	Q9LJU0.1	COBRA-like protein 10
SMil_00019660	-4.11326	0.00471431	0.022772
SMil_00019705	2.5156	0.00365521	0.0183936	B9SA89.1	CASP-like protein 2B1; Short=RcCASPL2B1
SMil_00019714	-2.0272	1.57e-09	3.58e-08
SMil_00019722	-5.42845	0.0014959	0.00860468	Q9SY02.1	Pentatricopeptide repeat-containing protein At4g02750
SMil_00019728	5.03497	0.00627008	0.0288351
SMil_00019739	-2.39894	2.41e-09	5.34e-08	Q84RD0.1	Transcription factor bHLH53
SMil_00019837	-6.86867	1.02e-06	1.36e-05	Q0JMB2.3	Zinc finger BED domain-containing protein RICESLEEPER 4
SMil_00019846	5.99265	0.000102903	0.000848113
SMil_00019850	-2.04448	0.00210481	0.0115014
SMil_00019881	5.8093	0.000469955	0.0032047
SMil_00019911	-2.83064	2.1e-05	0.000207465	P93051.2	Sugar transporter ERD6-like 7
SMil_00019958	5.91103	0.000264325	0.00193458
SMil_00019964	-2.23077	9.19e-06	9.88e-05
SMil_00019967	-2.78101	2.28e-10	6.01e-09	O24381.2	Plastidic ATP/ADP-transporter
SMil_00020002	-4.541	0.00656524	0.0299058	B9DFR3.1	Pectin acetylesterase 9
SMil_00020031	-7.57015	2.61e-35	8.41e-33	P22180.1	Plasma membrane ATPase 1
SMil_00020057	-6.38432	2.32e-08	4.28e-07
SMil_00020089	-7.90109	2.25e-08	4.16e-07	Q9SBA7.2	Sugar transport protein 8
SMil_00020171	-8.35674	1.26e-12	4.78e-11
SMil_00020178	-6.80265	8.19e-06	8.9e-05
SMil_00020200	-4.20126	2.85e-06	3.42e-05	Q9SFC6.1	Rho GDP-dissociation inhibitor 1; Short=AtRhoGDI1; Short=Rho GDI-1
SMil_00020201	-3.51489	2.68e-12	9.58e-11	Q8S397.2	Sodium/hydrogen exchanger 4
SMil_00020213	-3.33714	0.000967931	0.00592149	Q9ASW8.1	Protein WVD2-like 2
SMil_00020214	-3.47356	1.48e-11	4.7e-10	PF7939	Protein of unknown function (DUF1685)
SMil_00020238	-7.52782	1.08e-08	2.14e-07
SMil_00020254	-2.02097	0.00401404	0.0199286
SMil_00020255	3.35324	3.72e-05	0.000343707	Q8L8Q3.3	LOB domain-containing protein 25
SMil_00020267	6.8626	6.66e-07	9.2e-06
SMil_00020272	3.76735	0.000342546	0.0024353	Q9LY05.1	Ethylene-responsive transcription factor ERF106
SMil_00020281	-3.38865	3.45e-07	5.05e-06	O48676.1	UDP-glycosyltransferase 74B1
SMil_00020322	-7.08714	0.0114366	0.0466566	P29162.1	L-ascorbate oxidase homolog (Pollen-specific protein NTP303)
SMil_00020324	-2.52311	3.62e-10	9.28e-09
SMil_00020380	-2.50138	0.00211551	0.0115491	Q9ZUZ2.1	CDPK-related kinase 3; Short=AtCRK3
SMil_00020459	-2.80513	2.63e-05	0.000252949	PF12937	F-box-like
SMil_00020461	5.1946	0.000728955	0.00466834	PF12937	F-box-like
SMil_00020473	4.49037	0.00988359	0.0414536
SMil_00020489	7.532	1.94e-12	7.15e-11
SMil_00020512	6.92927	4.54e-07	6.47e-06	Q9LTF4.1	Putative pentatricopeptide repeat-containing protein At5g52630
SMil_00020520	-6.13163	0.00526143	0.0248927	Q9ZPE7.1	Protein EXORDIUM
SMil_00020522	-3.24622	0.00281043	0.0147592	O23207.1	Probable NAD(P)H dehydrogenase (quinone) FQR1-like 2
SMil_00020523	7.44536	2.81e-08	5.09e-07	P33020.2	Uncharacterized sugar kinase YeiI
SMil_00020543	2.36523	0.00696389	0.0313075
SMil_00020547	2.39781	0.000693615	0.00447729	Q9S9U1.1	L-type lectin-domain containing receptor kinase VII.1; Short=LecRK-VII.1
SMil_00020557	2.23673	6.06e-11	1.74e-09	Q5MAU8.1	Probable inactive purple acid phosphatase 27
SMil_00020567	10.2778	1.71e-17	1.2e-15
SMil_00020570	2.22494	8.35e-14	3.85e-12	Q8VXX9.1	Bet1-like protein At4g14600
SMil_00020614	-5.03856	0.00731599	0.0325554
SMil_00020632	2.08452	0.00393005	0.0195614
SMil_00020655	5.19211	0.00714203	0.0319828
SMil_00020670	-4.20422	0.0113919	0.0465003
SMil_00020695	-2.73342	0.00286445	0.014981
SMil_00020706	-2.5458	0.000585823	0.00387464	Q1XDE8.1	50S ribosomal protein L12, chloroplastic
SMil_00020707	-2.35856	3.27e-34	9.98e-32	Q9SB50.1	AP-4 complex subunit mu
SMil_00020709	-2.29566	0.00492011	0.0235906
SMil_00020759	7.18772	1.44e-07	2.26e-06
SMil_00020761	4.95445	0.00822689	0.0356917	Q9SJR5.1	Growth-regulating factor 3; Short=AtGRF3
SMil_00020764	5.26827	8.54e-06	9.24e-05
SMil_00020795	-3.33982	3.87e-05	0.00035644	Q9LRS0.1	Peroxisomal (S)-2-hydroxy-acid oxidase GLO2
SMil_00020866	6.35435	1.37e-05	0.000140487
SMil_00020886	-2.6224	0.000484265	0.00329203	PF6697	Protein of unknown function (DUF1191)
SMil_00020922	-3.16886	0.000539239	0.00360729
SMil_00020947	-8.57562	3.48e-10	8.95e-09
SMil_00020981	2.1463	0.00144972	0.00839347	P92998.2	Germin-like protein subfamily 1 member 1
SMil_00020993	-4.62347	0.00562556	0.0263429	Q9C516.1	Extra-large guanine nucleotide-binding protein 3
SMil_00020994	4.07614	5.79e-15	3.08e-13	Q9LMX4.1	Probable inactive purple acid phosphatase 1
SMil_00021001	-5.92742	0.00828015	0.0358909
SMil_00021013	-2.61537	5.68e-17	3.8e-15
SMil_00021049	3.31829	0.00877826	0.0376209	Q9FLZ5.1	Phosphatidylinositol 3,4,5-trisphosphate 3-phosphatase and protein-tyrosine-phosphatase PTEN1
SMil_00021062	-6.63448	9.95e-06	0.000105869
SMil_00021080	-2.54302	1.26e-05	0.000130993	Q9LTY6.1	Uridine kinase-like protein 5
SMil_00021133	-2.78588	4.41e-07	6.29e-06
SMil_00021135	-10.3847	1.49e-08	2.88e-07
SMil_00021138	-5.77029	6.43e-05	0.00055922	O23614.1	Carboxyl-terminal-processing peptidase 2, chloroplastic
SMil_00021145	5.9465	0.000145233	0.00114724
SMil_00021167	-2.96202	0.000485058	0.00329607
SMil_00021168	-5.99395	1.54e-24	2.17e-22	PF12776	Myb/SANT-like DNA-binding domain
SMil_00021170	6.45161	1.1e-05	0.000115715
SMil_00021189	-2.32137	3.97e-13	1.62e-11	Q42877.1	DNA-directed RNA polymerase II subunit RPB2; Short=RNA polymerase II subunit 2; Short=RNA polymerase II subunit B2
SMil_00021228	-3.67416	3.21e-07	4.74e-06	Q9M1E2.1	Protein NRT1/ PTR FAMILY 2.7; Short=AtNPF2.7
SMil_00021236	-9.10068	1.71e-13	7.5e-12
SMil_00021267	-5.62554	3.44e-11	1.04e-09
SMil_00021299	4.73162	3.13e-29	6.33e-27	Q43497.1	Monodehydroascorbate reductase; Short=MDAR
SMil_00021304	-4.42993	0.00496655	0.0237432
SMil_00021324	2.00751	0.00156781	0.00895668	PF6749	Protein of unknown function (DUF1218)
SMil_00021335	-7.21487	2.25e-36	7.67e-34	Q9FLF0.1	40S ribosomal protein S9-2
SMil_00021336	-6.02305	9.92e-11	2.77e-09	PF3004	Plant transposase (Ptta/En/Spm family)
SMil_00021347	-12.9325	1.23e-26	2.11e-24	Q9S7D9.1	Serine/threonine-protein kinase-like protein CCR1
SMil_00021382	-2.13019	3.53e-37	1.26e-34
SMil_00021417	4.5551	1.26e-06	1.65e-05	PF13963	Transposase-associated domain
SMil_00021430	-5.69716	5.13e-14	2.45e-12
SMil_00021434	-6.66418	5.03e-05	0.000449131	Q766C2.1	Aspartic proteinase nepenthesin-2
SMil_00021436	-3.80377	4.1e-12	1.42e-10
SMil_00021451	-9.14556	8.51e-14	3.92e-12
SMil_00021462	4.35454	0.000720615	0.004621
SMil_00021466	2.75214	5.71e-12	1.94e-10	Q9ZVX4.1	UDP-glycosyltransferase 90A1
SMil_00021480	-7.19666	3.61e-07	5.26e-06
SMil_00021496	3.30992	5.52e-06	6.25e-05	Q9ZVT7.1	Exosome complex component RRP4 homolog
SMil_00021520	6.15053	4.55e-05	0.000411616
SMil_00021526	-2.15286	2.52e-09	5.58e-08	Q84MA5.1	Cationic amino acid transporter 1
SMil_00021550	2.51114	1.58e-11	5.01e-10	Q9ZPR7.1	Ureide permease 1; Short=AtUPS1
SMil_00021585	-2.56029	9.74e-05	0.000809086
SMil_00021587	4.89722	1.01e-24	1.45e-22
SMil_00021626	5.28029	1.29e-05	0.0001339	Q9FJL0.1	Structural maintenance of chromosomes protein 4; Short=AtSMC4; Short=SMC protein 4; Short=SMC-4
SMil_00021632	4.08749	0.00276765	0.0145685
SMil_00021636	4.98908	0.000124616	0.00100583	Q6VMW0.1	8-hydroxyquercetin 8-O-methyltransferase
SMil_00021659	2.07075	6.41e-12	2.14e-10	Q9LS46.1	Aluminum-activated malate transporter 9; Short=AtALMT9
SMil_00021725	-3.54175	5.32e-18	3.98e-16	Q8W1Y0.1	Sister chromatid cohesion 1 protein 4; Short=AtRAD21-3; Short=AtRAD21.3
SMil_00021737	2.32015	0.00635385	0.0291425
SMil_00021738	-11.3121	2.5e-21	2.72e-19	PF3004	Plant transposase (Ptta/En/Spm family)
SMil_00021767	6.33347	7.05e-31	1.65e-28
SMil_00021775	-2.62778	2.21e-19	1.96e-17
SMil_00021793	-2.1464	1.88e-18	1.49e-16	Q8VZS6.1	GBF-interacting protein 1
SMil_00021804	4.86702	0.0102196	0.0425154
SMil_00021812	-3.41003	1.09e-08	2.16e-07
SMil_00021835	-4.53727	1.88e-07	2.87e-06
SMil_00021858	-2.53473	3.85e-05	0.000354688	Q6L400.1	Putative late blight resistance protein homolog R1B-16
SMil_00021892	-3.03863	1.26e-07	2e-06	PF407	Pathogenesis-related protein Bet v I family
SMil_00021929	-4.6569	7.49e-17	4.99e-15
SMil_00021942	-7.5461	1.11e-08	2.2e-07
SMil_00021962	-2.82891	0.0010596	0.00640334
SMil_00021974	-4.16936	2.01e-16	1.25e-14
SMil_00021975	-6.05002	9.85e-05	0.000816475
SMil_00021980	-7.30094	9.4e-39	3.53e-36
SMil_00021986	3.39953	0.00979863	0.0412179	H2DH21.1	Cytochrome P450 CYP72A219
SMil_00021989	-4.95963	2.03e-09	4.54e-08	P42056.2	Mitochondrial outer membrane protein porin of 36 kDa
SMil_00022053	-4.08771	0.00347635	0.0176177
SMil_00022102	2.29603	8.44e-10	2.03e-08	E2E2N7.1	Bicyclogermacrene synthase; Short=Ovtps4
SMil_00022119	-2.81792	0.00935466	0.0396787
SMil_00022132	-4.95097	0.00986896	0.0414112
SMil_00022137	6.29369	0.000342196	0.00243379	O81191.1	1,8-cineole synthase, chloroplastic; Short=SCS
SMil_00022140	3.74678	0.000353825	0.00250614	E4ZQC4.1	Vacuolar membrane protease
SMil_00022183	6.25261	2.69e-05	0.000258086
SMil_00022188	-2.60686	0.00040455	0.00281048	Q6DBP4.1	Pectin acetylesterase 8
SMil_00022259	-2.77686	1.93e-20	1.96e-18	Q945K7.1	Isocitrate dehydrogenase [NAD] catalytic subunit 5, mitochondrial
SMil_00022263	-5.62318	7.24e-05	0.000620925	Q62348.1	Translin
SMil_00022293	-10.1754	9.49e-17	6.16e-15
SMil_00022325	4.89128	1.79e-49	1.31e-46	A6YIH8.1	Premnaspirodiene oxygenase; Short=HPO
SMil_00022374	8.56285	6.11e-12	2.06e-10
SMil_00022385	-3.89728	2.16e-06	2.65e-05	P46270.1	Cytochrome b-c1 complex subunit 9
SMil_00022393	-4.54631	0.000623606	0.0040885
SMil_00022419	5.85689	0.000288405	0.00209033
SMil_00022432	-5.3021	0.00227568	0.0122755	PF7645	Calcium-binding EGF domain
SMil_00022441	-5.57544	0.00177645	0.00995814
SMil_00022451	7.16602	1.15e-07	1.83e-06	Q03878.1	Glycine-rich RNA-binding protein
SMil_00022452	3.31468	3.36e-07	4.93e-06	O65782.1	Cytochrome P450 83B1
SMil_00022477	-3.65889	4.44e-24	6.04e-22	Q66GQ6.1	Type I inositol polyphosphate 5-phosphatase 5; Short=At5PTase5
SMil_00022485	4.94015	2.87e-08	5.19e-07
SMil_00022488	5.77239	0.00042271	0.0029247
SMil_00022499	-7.36053	4.97e-08	8.55e-07	Q9C552.1	Pumilio homolog 23; Short=APUM-23; Short=AtPUM23
SMil_00022509	-2.19925	5.61e-08	9.51e-07	Q9M8U1.1	Probable calcium-binding protein CML18
SMil_00022530	-2.62178	2.55e-07	3.81e-06	Q4PSI6.1	FBD-associated F-box protein At4g13985
SMil_00022607	-2.26675	0.00049293	0.00334335
SMil_00022668	-6.61327	6.2e-06	6.94e-05
SMil_00022669	-3.27236	0.00704803	0.0316323	PF14683	Polysaccharide lyase family 4, domain III|PF06045
SMil_00022703	-6.71797	1.93e-06	2.42e-05
SMil_00022708	4.69075	8.44e-22	9.72e-20
SMil_00022709	-2.8182	0.00282198	0.0148039	Q9C5E5.1	Diacylglycerol kinase 5; Short=AtDGK5; Short=DAG kinase 5
SMil_00022736	-7.71473	4.77e-07	6.78e-06	Q3E6Y3.1	Uncharacterized protein At1g28695
SMil_00022742	-3.9038	2e-12	7.34e-11
SMil_00022788	-5.00829	0.00970509	0.0409278
SMil_00022803	5.71521	0.000730171	0.00467306
SMil_00022829	-3.21925	9.97e-14	4.54e-12
SMil_00022841	-6.7458	1.05e-36	3.61e-34	Q9S9V9.1	Putative F-box/LRR-repeat protein 23
SMil_00022842	-2.86168	1.28e-18	1.04e-16	Q9S9V9.1	Putative F-box/LRR-repeat protein 23
SMil_00022843	-2.37243	0.00147838	0.00851561	Q9S9V9.1	Putative F-box/LRR-repeat protein 23
SMil_00022857	8.27368	5.85e-11	1.69e-09
SMil_00022913	3.2369	3.37e-14	1.64e-12
SMil_00022944	2.81298	6.57e-05	0.000569866
SMil_00022945	3.01972	2.23e-13	9.51e-12	Q6WNQ8.1	Cytochrome P450 81E8 [Medicago truncatula]
SMil_00022953	2.42755	9.7e-06	0.000103483
SMil_00022979	-4.34471	6.23e-05	0.000544	Q6J9S1.1	Ethylene-responsive transcription factor RAP2-11
SMil_00023038	-5.52249	0.00484483	0.0232907
SMil_00023044	6.84988	1.93e-14	9.65e-13
SMil_00023164	-4.82706	0.00360796	0.0182122	Q9M2N5.1	Zinc finger BED domain-containing protein DAYSLEEPER
SMil_00023166	-6.56209	6.59e-06	7.33e-05
SMil_00023177	-4.21021	5.42e-09	1.13e-07
SMil_00023235	-2.68179	4.98e-08	8.56e-07	Q38998.2	Potassium channel AKT1
SMil_00023236	-3.72789	1.14e-30	2.61e-28	Q9XI23.1	Boron transporter 4
SMil_00023270	-3.70762	0.00134532	0.00786481
SMil_00023373	-2.47405	0.00595676	0.0276549	P81898.2	Peptide-N4-(N-acetyl-beta-glucosaminyl)asparagine amidase A; Short=PNGase A
SMil_00023374	-7.22808	7.17e-06	7.9e-05
SMil_00023378	2.13833	4.08e-12	1.41e-10	A2RVM0.1	Short-chain dehydrogenase TIC 32, chloroplastic
SMil_00023383	-6.92358	1.18e-07	1.88e-06
SMil_00023391	5.38862	9.91e-11	2.77e-09
SMil_00023393	-3.10889	0.00117758	0.0070192	P0CL95.1	Acyl-protein thioesterase 1 >P0CL94.1 RecName
SMil_00023418	-2.65972	0.000101155	0.000836299	P22970.2	Anti-H(O) lectin 1
SMil_00023427	-4.78584	0.000390261	0.00272531	Q9LSP0.2	Peroxidase 29; Short=Atperox P29
SMil_00023462	-4.32689	0.00298197	0.015496	Q9MAG3.2	ABC transporter G family member 24; Short=ABC transporter ABCG.24; Short=AtABCG24
SMil_00023476	-2.04185	0.0020066	0.0110371
SMil_00023504	3.54654	0.0122229	0.0493076
SMil_00023564	-8.0847	3.28e-07	4.83e-06	Q3E8Z8.1	Putative pectinesterase/pectinesterase inhibitor 28
SMil_00023577	-8.38493	2.25e-11	6.93e-10	PF5180	DNL zinc finger
SMil_00023580	3.21148	0.000345068	0.00245124	Q9FJ93.1	Dehydration-responsive element-binding protein 1D; Short=Protein DREB1D
SMil_00023628	6.59635	4.77e-09	1e-07	P42055.2	Mitochondrial outer membrane protein porin of 34 kDa
SMil_00023667	-2.06302	4.97e-11	1.45e-09
SMil_00023759	-6.81802	0.00183771	0.0102544	I1KEV6.2	UDP-glycosyltransferase 79B30
SMil_00023776	-5.93847	8.2e-30	1.75e-27	Q6AVI0.1	Zinc finger BED domain-containing protein RICESLEEPER 2
SMil_00023796	-3.55473	1.24e-09	2.87e-08	B8AJT9.1	Magnesium transporter MRS2-I
SMil_00023842	-5.80677	1.53e-11	4.86e-10	Q6NLY8.1	HVA22-like protein k; Short=AtHVA22k
SMil_00023878	5.45048	0.00126187	0.00745785
SMil_00023921	-5.61297	0.000619063	0.004066
SMil_00023924	-5.23154	0.00435222	0.0213182	H2DH21.1	Cytochrome P450 CYP72A219
SMil_00023928	-2.38716	4.17e-05	0.000381034	P26792.1	Beta-fructofuranosidase, insoluble isoenzyme 1
SMil_00023939	-2.33268	7.98e-05	0.000678519	F4IN58.1	Piezo-type mechanosensitive ion channel homolog
SMil_00023978	6.03391	8.33e-05	0.000705216	PF5699	hAT family C-terminal dimerisation region
SMil_00023983	-5.38007	0.00226112	0.0122119
SMil_00023987	-6.93251	0.000140169	0.00111295	Q948R8.1	Protein TOM THREE HOMOLOG 1
SMil_00024033	2.1033	0.00277384	0.0145958	Q9S9N9.1	Cinnamoyl-CoA reductase 1; Short=AtCCR1
SMil_00024038	-6.80081	6.87e-06	7.6e-05
SMil_00024079	3.44357	8.73e-07	1.18e-05	Q5YLB5.1	DNA gyrase subunit A, chloroplastic/mitochondrial
SMil_00024081	-5.19388	3.9e-07	5.64e-06
SMil_00024100	-3.29691	2.18e-08	4.05e-07
SMil_00024101	8.3913	4.42e-15	2.41e-13
SMil_00024109	-3.94651	1.02e-06	1.35e-05	P26519.1	Glyceraldehyde-3-phosphate dehydrogenase, cytosolic
SMil_00024123	-5.82934	1.33e-13	5.93e-12	Q42954.1	Pyruvate kinase, cytosolic isozyme; Short=PK
SMil_00024126	-2.18117	1.37e-12	5.17e-11	Q84RD0.1	Transcription factor bHLH53
SMil_00024129	-7.57296	5.05e-08	8.65e-07	Q9C5Y2.2	Ent-kaurenoic acid oxidase 2; Short=AtKAO2
SMil_00024179	4.74685	0.00035584	0.00251859	Q9SYM2.2	B-box zinc finger protein 22
SMil_00024180	3.06939	0.00319304	0.0163918	Q9SR40.1	Laccase-7
SMil_00024189	-5.51722	0.00198835	0.0109562
SMil_00024190	-5.2877	0.00796157	0.0347986
SMil_00024193	-7.35374	5.47e-05	0.000483817	Q9SKU1.1	Clathrin light chain 1
SMil_00024206	6.15324	9.77e-05	0.000811247	Q4PSI6.1	FBD-associated F-box protein At4g13985
SMil_00024218	3.0511	0.000122799	0.000993351	Q9SX38.2	Putative disease resistance protein At1g50180
SMil_00024249	-4.91074	8.43e-19	6.97e-17	PF5056	Protein of unknown function (DUF674)
SMil_00024281	-6.73011	7.95e-06	8.67e-05
SMil_00024302	-4.0672	0.00436628	0.0213728	Q9LUM3.1	Subtilisin-like protease SBT1.5
SMil_00024305	2.63502	1.44e-06	1.86e-05
SMil_00024358	5.32533	0.00203155	0.011149
SMil_00024379	6.8148	1.33e-06	1.73e-05
SMil_00024405	-4.13165	0.0051262	0.0243592
SMil_00024428	4.22263	1.27e-45	6.73e-43	P17642.1	Pathogenesis-related protein STH-2
SMil_00024450	2.93927	0.00643815	0.0294397
SMil_00024468	-7.46072	4.24e-10	1.08e-08
SMil_00024551	-3.02918	0.000205972	0.00155246
SMil_00024590	-3.5699	0.000706816	0.00454946	Q9LN59.2	Putative wall-associated receptor kinase-like 11
SMil_00024600	-3.6863	4.47e-09	9.45e-08	O22197.1	Probable E3 ubiquitin-protein ligase RHC1A
SMil_00024630	-3.60678	0.0024644	0.0131785	PF10184	Uncharacterized conserved protein (DUF2358)
SMil_00024634	4.23897	4.21e-06	4.89e-05
SMil_00024674	3.88897	1.4e-10	3.82e-09
SMil_00024676	4.35858	0.0069857	0.0313912
SMil_00024678	-2.23806	0.00463339	0.0224475	Q94AA4.1	ATP-dependent 6-phosphofructokinase 3; Short=ATP-PFK 3; Short=Phosphofructokinase 3
SMil_00024715	2.03644	0.0116463	0.0473734	Q9LSF8.1	Cytochrome P450 82G1
SMil_00024754	-6.95332	1e-06	1.34e-05
SMil_00024812	-4.89241	6.98e-08	1.16e-06	Q3E8W4.1	Receptor-like protein kinase ANXUR2
SMil_00024824	-3.87579	0.0100163	0.0419081
SMil_00024828	-8.23165	0.00961085	0.0405772	Q00451.1	36.4 kDa proline-rich protein
SMil_00024926	-5.48464	1.56e-08	2.99e-07
SMil_00024927	-2.7956	3.26e-10	8.38e-09
SMil_00024950	-2.55447	0.00314989	0.0162074
SMil_00024986	-4.57511	1.62e-06	2.07e-05	Q05085.1	Protein NRT1/ PTR FAMILY 6.3; Short=AtNPF6.3
SMil_00024999	5.34792	6.23e-14	2.95e-12
SMil_00025000	8.06477	3.19e-10	8.21e-09
SMil_00025006	2.30469	3.72e-05	0.000344393	Q9FKL6.1	Calmodulin-binding protein 60 B
SMil_00025008	-8.20869	1.34e-10	3.66e-09
SMil_00025009	-6.59246	0.0101639	0.0423621	Q00451.1	36.4 kDa proline-rich protein
SMil_00025015	-2.22825	2.46e-05	0.000238491
SMil_00025016	7.56058	1.17e-08	2.31e-07
SMil_00025026	-3.3921	0.00265012	0.0140407
SMil_00025028	-2.03539	7.28e-10	1.77e-08	Q9STG9.1	Amidophosphoribosyltransferase 2, chloroplastic; Short=AtATase2; Short=AtPURF2; Short=PRPP2
SMil_00025033	6.98987	4.23e-08	7.37e-07
SMil_00025044	5.24505	3.32e-09	7.17e-08
SMil_00025054	-7.63206	6.05e-10	1.49e-08	A4GFB7.1	Profilin-2 (Pollen allergen Ole e 2)
SMil_00025071	-6.82184	1.2e-07	1.9e-06	P03010.1	Putative AC9 transposase
SMil_00025075	-3.25132	0.000349623	0.00247999
SMil_00025076	-6.26686	0.000233343	0.00173507	Q9LZJ3.1	Xyloglucan 6-xylosyltransferase 1; Short=AtXT1
SMil_00025093	-8.76819	1.7e-12	6.32e-11
SMil_00025097	-4.33722	8.23e-16	4.84e-14	O04111.1	Chalcone synthase
SMil_00025113	9.60225	3.86e-15	2.11e-13
SMil_00025125	2.74125	9.1e-13	3.54e-11	PF3030	Inorganic H+ pyrophosphatase
SMil_00025128	-6.17636	1.38e-05	0.000141471
SMil_00025140	3.11732	4.59e-10	1.16e-08	Q9LHD1.1	ABC transporter B family member 15; Short=ABC transporter ABCB.15; Short=AtABCB15
SMil_00025148	-5.31528	0.00226543	0.0122306	P0C2F6.1	Putative ribonuclease H protein At1g65750
SMil_00025156	4.3173	8.33e-06	9.04e-05
SMil_00025171	-2.18322	2.03e-07	3.09e-06
SMil_00025188	4.33699	0.00111564	0.00670734	PF12796	Ankyrin repeats (3 copies)
SMil_00025205	-3.45885	9.82e-08	1.59e-06	PF12937	F-box-like
SMil_00025206	3.06849	0.000973232	0.00594771	Q60CZ8.1	Putative late blight resistance protein homolog R1A-10 >Q6L438.2 RecName
SMil_00025224	-8.94035	6.59e-13	2.6e-11
SMil_00025228	3.79171	3.76e-07	5.47e-06	Q9FDZ9.1	60S ribosomal protein L21-2
SMil_00025261	-6.41421	1.24e-08	2.43e-07
SMil_00025263	-4.96874	0.00796048	0.0347986	Q9LJW5.1	Mini zinc finger protein 2; Short=AtMIF2
SMil_00025328	-8.00409	5.29e-10	1.31e-08
SMil_00025330	5.99596	0.000115855	0.000943177
SMil_00025354	-5.79525	2.65e-05	0.000254131
SMil_00025389	3.58389	3.26e-05	0.000305002
SMil_00025390	-4.95242	0.000381081	0.00266566
SMil_00025397	-2.48201	0.000388774	0.00271557	Q9FM79.1	Pectinesterase QRT1; Short=AtQRT1; Short=PE QRT1
SMil_00025473	2.64418	0.00124088	0.0073486	F4KA50.2	LEAF RUST 10 DISEASE-RESISTANCE LOCUS RECEPTOR-LIKE PROTEIN KINASE-like 2.2
SMil_00025508	-2.22819	2.41e-06	2.93e-05	Q94LW6.1	Probable sulfate transporter 3.5
SMil_00025537	-4.41651	4.69e-37	1.64e-34	Q9LU14.1	GDSL esterase/lipase APG
SMil_00025538	-6.32988	4.83e-05	0.000433651	Q1XDS2.1	Uncharacterized protein ycf20 (chloroplast) [Pyropia yezoensis]
SMil_00025556	-2.42515	5.97e-07	8.32e-06	Q94AN4.1	AP2-like ethylene-responsive transcription factor At1g16060
SMil_00025562	-3.36213	2.74e-08	4.97e-07
SMil_00025574	3.6425	7.05e-48	4.8e-45
SMil_00025589	7.7227	3.06e-09	6.68e-08
SMil_00025598	3.73165	7.07e-29	1.38e-26	Q9UUC8.1	54S ribosomal protein L51, mitochondrial
SMil_00025628	-2.65889	3.24e-21	3.47e-19	Q9SW70.1	Stress-related protein
SMil_00025629	-5.18907	0.00502748	0.0239914
SMil_00025633	-4.01544	1.21e-08	2.37e-07
SMil_00025658	-5.21616	0.00032871	0.00235044	PF2536	mTERF
SMil_00025678	-5.84323	0.000226947	0.00169052	Q70PR7.2	Vinorine synthase
SMil_00025687	6.02692	8.32e-18	6.07e-16	Q6VMW0.1	8-hydroxyquercetin 8-O-methyltransferase
SMil_00025717	-3.87332	6.62e-06	7.35e-05	Q8LBF7.1	Bidirectional sugar transporter SWEET7; Short=AtSWEET7
SMil_00025726	5.40313	0.0103993	0.0431343
SMil_00025732	3.50267	1.99e-07	3.02e-06
SMil_00025742	3.62739	2.44e-09	5.4e-08	Q60CZ8.1	Putative late blight resistance protein homolog R1A-10 >Q6L438.2 RecName
SMil_00025747	5.33719	1.06e-05	0.0001116
SMil_00025782	3.44224	9.59e-14	4.38e-12
SMil_00025788	-2.64537	5.51e-08	9.35e-07
SMil_00025821	3.69911	0.00180215	0.0100906
SMil_00025822	-6.99017	6.98e-07	9.63e-06
SMil_00025876	-6.81193	1.28e-06	1.67e-05
SMil_00025880	2.14263	2.05e-06	2.53e-05
SMil_00025887	-7.85864	1.77e-09	4.01e-08
SMil_00025925	-6.47561	0.000155029	0.00121544	P46942.1	ATP-dependent RNA helicase-like protein DB10
SMil_00025972	-7.27891	3.97e-07	5.73e-06	O82368.1	Uncharacterized protein At2g29880
SMil_00025984	-7.46233	3.34e-08	5.96e-07
SMil_00025990	5.45048	0.00126187	0.00745785
SMil_00025992	3.97756	0.000181943	0.00139506
SMil_00026005	-7.30431	8.41e-07	1.14e-05
SMil_00026052	-6.36158	4.1e-05	0.000374922
SMil_00026087	-5.5649	0.000933498	0.00575293
SMil_00026094	-5.25627	0.0115157	0.0469466
SMil_00026112	-2.28162	0.00480424	0.0231221	Q949Z1.1	Polygalacturonase At1g48100; Short=PG
SMil_00026132	-3.05631	1.9e-06	2.37e-05	PF2362	B3 DNA binding domain
SMil_00026149	2.15072	0.00685049	0.0309022
SMil_00026164	2.55936	0.000655854	0.00427313	Q9FN89.1	Monofunctional riboflavin biosynthesis protein RIBA 3, chloroplastic
SMil_00026170	-8.93766	1.55e-12	5.78e-11
SMil_00026185	2.45282	4.25e-05	0.000387491
SMil_00026197	-8.64897	5.08e-12	1.73e-10
SMil_00026207	4.61936	3.37e-15	1.86e-13
SMil_00026214	-3.299	0.00421167	0.02072	Q9LZ99.1	Expansin-A9; Short=AtEXPA9
SMil_00026225	-3.77674	0.0108046	0.0445127
SMil_00026253	-2.98172	0.000272362	0.00198784
SMil_00026260	-6.5972	3.69e-17	2.51e-15
SMil_00026339	-2.30257	6.2e-09	1.28e-07	Q84W80.2	F-box/LRR-repeat protein At3g03360
SMil_00026342	5.19885	0.00135101	0.00789442	D1MI46.1	Geraniol 8-hydroxylase
SMil_00026348	-6.3087	0.000223621	0.00166888	PF4434	SWIM zinc finger
SMil_00026349	3.07061	0.000103623	0.000853088
SMil_00026357	-8.10237	3.22e-09	6.99e-08	P49062.1	Exopolygalacturonase clone GBGE184; Short=ExoPG
SMil_00026384	-5.15473	6.05e-33	1.69e-30
SMil_00026398	-2.24192	9.65e-05	0.000802865	Q9M9W3.1	Serine/threonine-protein phosphatase PP1 isozyme 9
SMil_00026447	-5.66577	0.000482271	0.00327942
SMil_00026456	-8.37313	0.000924165	0.00570747	PF5664	Plant family of unknown function (DUF810)
SMil_00026459	-2.90476	3.25e-05	0.000304307	Q9LTW9.1	Fasciclin-like arabinogalactan protein 14
SMil_00026460	-6.76531	0.00457144	0.0221988	Q9LTW9.1	Fasciclin-like arabinogalactan protein 14
SMil_00026478	-3.76954	3.32e-11	1e-09	O04084.2	Serine carboxypeptidase-like 31
SMil_00026511	3.16922	0.00050186	0.00339763	Q9SD53.1	UPF0481 protein At3g47200
SMil_00026585	5.46534	3.54e-08	6.28e-07
SMil_00026592	-2.53065	6.09e-10	1.49e-08
SMil_00026608	-2.5607	0.000123116	0.000995642
SMil_00026624	-5.63662	0.00113635	0.00681371
SMil_00026690	-2.50291	2.52e-07	3.78e-06	PF2536	mTERF
SMil_00026724	-3.08289	1.02e-07	1.65e-06	A6YIH8.1	Premnaspirodiene oxygenase; Short=HPO
SMil_00026729	-3.66251	4.23e-11	1.26e-09	Q8RXF8.1	Mitochondrial Rho GTPase 1; Short=AtMIRO1
SMil_00026734	-6.9784	4.58e-07	6.51e-06
SMil_00026745	-3.38275	9.43e-30	1.97e-27	Q9LHQ6.1	Organic cation/carnitine transporter 4; Short=AtOCT4
SMil_00026759	-6.92875	5.8e-05	0.000509605
SMil_00026763	-2.57644	8.28e-10	1.99e-08
SMil_00026786	-3.54911	1.87e-13	8.15e-12	F4J8D3.1	Protein TPLATE
SMil_00026802	-5.78919	0.0111481	0.0456834
SMil_00026820	-2.6771	8.56e-09	1.73e-07
SMil_00026830	-5.42352	5.39e-05	0.000476888
SMil_00026837	2.26573	1.43e-11	4.56e-10	Q9LZS7.1	GDSL esterase/lipase At5g03610
SMil_00026911	4.94207	0.00117643	0.0070138	PF13966	zinc-binding in reverse transcriptase
SMil_00026922	5.32557	0.00230101	0.0123953
SMil_00026940	-3.81232	9.17e-20	8.61e-18	Q9FXB6.1	GDSL esterase/lipase LIP-4
SMil_00026948	-3.72445	4.95e-11	1.45e-09	P11670.1	Basic form of pathogenesis-related protein 1; Short=PRP 1
SMil_00026949	-6.54278	6.53e-08	1.09e-06	P13447.1	Anther-specific protein LAT52 [Erythranthe guttatus]
SMil_00026959	2.06346	1.05e-14	5.43e-13	Q0P5W1.1	Vacuolar protein sorting-associated protein 8 homolog
SMil_00026963	2.39012	1.06e-26	1.83e-24	PF650	CRAL/TRIO domain
SMil_00026972	7.01228	2.72e-07	4.05e-06
SMil_00026976	3.19497	9.48e-25	1.38e-22	Q6L3X3.1 PUTATIVE PSEUDOGENE	RecName
SMil_00026996	-3.6655	3.99e-27	7.07e-25	Q9FFN2.2	Probable glycosyltransferase At5g03795
SMil_00026997	9.7647	1.21e-15	6.92e-14
SMil_00027008	-4.90074	0.00138394	0.00806048
SMil_00027057	5.53907	1.72e-64	2.19e-61
SMil_00027062	2.31544	9.22e-06	9.9e-05	Q42588.2	Serine acetyltransferase 1, chloroplastic; Short=AtSAT-1
SMil_00027067	4.43009	0.00617312	0.0284652	PF13499	EF-hand domain pair
SMil_00027074	2.10422	2e-10	5.32e-09
SMil_00027077	-6.67293	9.28e-40	3.67e-37	Q8L633.1	Ribonuclease Z, chloroplastic; Short=RNase Z
SMil_00027078	-7.2239	2.37e-07	3.58e-06
SMil_00027080	-2.14793	0.00738206	0.0327648	O04111.1	Chalcone synthase
SMil_00027086	3.32058	0.000123514	0.000998037
SMil_00027093	-6.07538	0.000258592	0.00189965
SMil_00027104	11.2738	1.08e-20	1.11e-18
SMil_00027122	11.1192	2.13e-20	2.16e-18	O65759.1	Histone H2AX
SMil_00027130	9.96012	1.13e-57	1.27e-54	F6H7K5.1	Thiamine thiazole synthase 2, chloroplastic
SMil_00027133	5.72599	0.00057791	0.00382836	E5ABQ8.1	Probable Xaa-Pro aminopeptidase P; Short=AMPP; Short=Aminopeptidase P
SMil_00027182	-3.29557	2.46e-06	2.99e-05	Q9LP65.1	Protein C2-DOMAIN ABA-RELATED 5
SMil_00027225	2.40804	9.53e-07	1.28e-05	Q41253.1	Rac-like GTP-binding protein RAC13
SMil_00027238	-4.37498	0.00110436	0.00664776
SMil_00027246	7.14792	1.15e-06	1.52e-05	Q94F62.2	BRASSINOSTEROID INSENSITIVE 1-associated receptor kinase 1; Short=AtBAK1; Short=BRI1-associated receptor kinase 1
SMil_00027249	4.6065	0.00375431	0.0188211	P29022.1	Endochitinase A
SMil_00027257	8.56115	9.16e-12	3.02e-10
SMil_00027290	-7.45523	1.72e-08	3.27e-07	O82480.1	Rac-like GTP-binding protein ARAC7
SMil_00027330	-4.55738	1.12e-14	5.78e-13
SMil_00027334	6.01425	3.74e-13	1.54e-11	Q8GYL9.1	Protein Brevis radix-like 2; Short=AtBRXL2
SMil_00027419	-7.11348	3.97e-07	5.73e-06	P49209.3	60S ribosomal protein L9-1
SMil_00027475	8.62648	7.19e-12	2.39e-10	F4JWR0.1	ACT domain-containing protein ACR2
SMil_00027476	2.43127	0.00420868	0.0207122
SMil_00027481	-6.35261	0.000629896	0.00411775	Q6E2Z6.1	1-Cys peroxiredoxin
SMil_00027539	-2.70264	9.76e-06	0.000104	Q9SSE8.1	Probable glycosyltransferase At3g07620
SMil_00027552	-7.21772	1.74e-06	2.2e-05	P48979.1	Polygalacturonase; Short=PG
SMil_00027556	-2.31544	0.000900006	0.00558311	Q9SRM9.1	Aluminum-activated malate transporter 8; Short=AtALMT8
SMil_00027558	-6.08355	0.000132191	0.00105851
SMil_00027614	5.26335	0.000361018	0.00254784	PF9331	Domain of unknown function (DUF1985)
SMil_00027636	4.94794	0.00750331	0.0331872	Q6Z4H0.1	Probable 6-phosphogluconolactonase 2; Short=6PGL 2 >A2YNH4.1 RecName
SMil_00027661	-5.3832	0.00197598	0.0108971
SMil_00027682	-5.15948	0.00669514	0.0303502	PF13963	Transposase-associated domain|PF02902
SMil_00027724	5.18171	3.62e-09	7.74e-08
SMil_00027737	-5.88562	0.00160932	0.00916339
SMil_00027773	-8.32805	0.000958176	0.00587656	P49062.1	Exopolygalacturonase clone GBGE184; Short=ExoPG
SMil_00027822	5.59122	1.66e-06	2.11e-05
SMil_00027841	-7.5792	1.1e-51	9.17e-49
SMil_00027929	-2.08397	7.01e-08	1.16e-06	Q9LIS1.1	Protein ECERIFERUM 26-like; Short=CER26-like
SMil_00028004	-5.23931	0.00281235	0.0147614	P98183.1	Tabersonine 16-hydroxylase
SMil_00028011	5.62011	0.000605665	0.00398964
SMil_00028025	-2.77124	3.94e-13	1.62e-11	Q8L706.1	Synaptotagmin-5
SMil_00028027	2.7341	0.00698902	0.0314012
SMil_00028036	-2.85755	0.000547998	0.00365753
SMil_00028046	2.06516	2.32e-06	2.84e-05	PF2519	Auxin responsive protein
SMil_00028059	-6.97917	1.76e-06	2.22e-05
SMil_00028071	-3.27899	0.000204115	0.00154044
SMil_00028098	4.16924	0.00425216	0.0208805	Q6Z1D5.1	Autophagy-related protein 8C
SMil_00028108	2.95125	0.00217431	0.0118348
SMil_00028144	6.07939	0.000180748	0.00138699
SMil_00028194	5.0233	0.00928189	0.0394329
SMil_00028203	2.39601	0.000546539	0.00364862	Q07423.1	Hexose carrier protein HEX6
SMil_00028219	-5.31699	0.000287695	0.00208673
SMil_00028222	-8.95737	2.05e-12	7.5e-11
SMil_00028225	7.45242	3.77e-11	1.12e-09	P80595.2	Apyrase
SMil_00028228	7.60647	6.68e-09	1.37e-07
SMil_00028241	6.58332	1.16e-05	0.000120918
SMil_00028242	-3.18941	0.0108395	0.0446252	F4HWQ8.1	Cell wall / vacuolar inhibitor of fructosidase 1; Short=AtC/VIF1
SMil_00028261	-6.06134	0.0112475	0.0460201
SMil_00028270	-5.89675	0.000151185	0.00118785
SMil_00028297	2.1759	0.00185196	0.010328	PF4434	SWIM zinc finger
SMil_00028298	-5.49103	0.000199596	0.00151141	PF3004	Plant transposase (Ptta/En/Spm family)|PF03017
SMil_00028307	4.80398	4.01e-16	2.44e-14
SMil_00028387	3.96577	0.00055403	0.00369442
SMil_00028391	-4.91832	1.21e-14	6.19e-13	Q38946.1	Glutamate dehydrogenase 2; Short=GDH 2
SMil_00028403	-5.08094	0.00719275	0.032139	Q5C9I9.1	(-)-isopiperitenol/(-)-carveol dehydrogenase, mitochondrial
SMil_00028409	4.00095	9.92e-07	1.32e-05	P35402.1	ER lumen protein-retaining receptor A
SMil_00028412	2.2423	2.77e-05	0.000264051
SMil_00028416	-9.73684	7.45e-16	4.42e-14
SMil_00028424	7.88382	1.45e-09	3.32e-08
SMil_00028430	3.91627	4.83e-22	5.66e-20	Q8VXV4.1	Chaperone protein dnaJ 16; Short=AtDjB16; Short=AtJ16
SMil_00028451	-5.35411	0.00355571	0.0179701	PF13960	Domain of unknown function (DUF4218)|PF02992
SMil_00028455	5.62587	1.13e-40	4.74e-38	O04893.1	Alpha-glucosidase
SMil_00028524	-8.29761	1.68e-10	4.52e-09	Q8LSN2.1	AP2-like ethylene-responsive transcription factor BBM2; Short=BnBBM2
SMil_00028539	2.02755	3.39e-05	0.000315666	Q9XGN4.1	Galactinol synthase 1; Short=ArGolS1; Short=GolS-1
SMil_00028545	3.00414	0.00180983	0.0101239	PF3352	Methyladenine glycosylase
SMil_00028566	-9.53715	4.81e-15	2.61e-13	Q9SSC9.2	Pseudo histidine-containing phosphotransfer protein 6
SMil_00028619	2.00148	0.000286344	0.00207867
SMil_00028651	-8.23595	5.42e-10	1.34e-08	Q6L3X3.1 PUTATIVE PSEUDOGENE	RecName
SMil_00028690	4.82098	2.99e-10	7.74e-09
SMil_00028721	-6.47962	2.5e-05	0.000241227
SMil_00028731	-8.06123	6.02e-08	1.01e-06	Q41916.2	Cysteine proteinase inhibitor 5; Short=AtCYS-5
SMil_00028742	-5.80652	0.000236557	0.00175496
SMil_00028794	-2.40614	0.00521402	0.0247284
SMil_00028800	4.19801	0.00208058	0.0113945	O50001.1	Major allergen Pru ar 1
SMil_00028831	5.61152	5.79e-11	1.67e-09	F4JXC5.1	Subtilisin-like protease SBT5.4
SMil_00028848	-4.9364	0.00804412	0.0350808
SMil_00028862	8.32512	6.54e-11	1.88e-09
SMil_00028907	6.28602	6.78e-05	0.000586366
SMil_00028911	6.10734	6.43e-05	0.000559737
SMil_00028916	-5.84706	5.66e-75	1.11e-71
SMil_00028979	-7.22574	7.73e-05	0.000659817
SMil_00028988	-5.49883	0.000930089	0.00573555
SMil_00028990	-9.27942	9.17e-14	4.21e-12
SMil_00028992	2.81134	5.31e-09	1.11e-07	O49675.1	Probable carotenoid cleavage dioxygenase 4, chloroplastic; Short=AtCCD4
SMil_00029023	-6.26335	7.99e-05	0.000679773	PF13962	Domain of unknown function
SMil_00029043	7.91079	1.25e-09	2.9e-08	P52839.2	Cytosolic sulfotransferase 12; Short=AtSOT12
SMil_00029050	-6.06444	2.04e-16	1.26e-14	Q10DV7.1	Actin-1
SMil_00029093	-9.2001	7.7e-14	3.58e-12
SMil_00029144	-7.53059	1.21e-08	2.38e-07
SMil_00029153	-5.33208	0.0034099	0.017344	Q9M2F1.2	40S ribosomal protein S27-2
SMil_00029202	-3.10288	8.03e-16	4.73e-14	Q9FYK2.1	Probable calcium-binding protein CML25
SMil_00029223	6.72274	5.3e-06	6.02e-05
SMil_00029226	5.94803	0.000202965	0.00153413
SMil_00029271	3.03619	5.62e-05	0.00049453
SMil_00029381	-2.67821	8.26e-05	0.00069996
SMil_00029419	-4.44965	9.53e-06	0.000101838
SMil_00029423	-7.19935	1.37e-07	2.15e-06
SMil_00029436	2.60889	0.0107787	0.0444372
SMil_00029447	-2.79506	2.85e-09	6.25e-08
SMil_00029455	-5.31785	9.3e-09	1.87e-07	Q8LAH8.2	Nucleoside diphosphate kinase IV, chloroplastic/mitochondrial; Short=NDK IV; Short=NDP kinase IV; Short=NDPK IV
SMil_00029461	2.06219	0.000619389	0.00406723
SMil_00029466	5.57651	0.00297228	0.0154648
SMil_00029471	-4.35133	4.78e-09	1.01e-07	O48850.2	Vesicle-associated membrane protein 725; Short=AtVAMP725
SMil_00029509	-7.40843	2.08e-08	3.88e-07
SMil_00029671	3.38272	8.99e-22	1.03e-19
SMil_00029674	2.00913	0.0103057	0.0428006	E2E2N7.1	Bicyclogermacrene synthase; Short=Ovtps4
SMil_00029698	8.24553	1.21e-10	3.31e-09
SMil_00029711	6.98922	4.18e-07	5.98e-06
SMil_00029735	-7.59698	1.25e-08	2.44e-07	PF13359	DDE superfamily endonuclease
SMil_00029759	5.03935	0.00810054	0.0352466	Q8VY07.1	Clathrin interactor EPSIN 1
SMil_00029764	-8.5778	3.73e-11	1.12e-09
SMil_00029781	-6.20622	3.16e-05	0.0002971
SMil_00029790	-5.30929	0.00285893	0.0149628
SMil_00029813	-3.66579	6.67e-47	4.25e-44	Q9ASR1.1	Elongation factor 2; Short=EF-2
SMil_00029827	-3.78515	4.69e-12	1.61e-10
SMil_00029851	-8.19585	1.84e-09	4.13e-08	PF13976	GAG-pre-integrase domain
SMil_00029871	-3.03952	0.00983086	0.0413034
SMil_00029877	4.81224	0.0018269	0.0102058
SMil_00029918	5.66624	0.000564515	0.00375407
SMil_00029928	-4.84963	0.00980771	0.0412358
SMil_00029953	-2.7971	0.00368577	0.0185286
SMil_00029957	-3.30913	0.00163997	0.00930175
SMil_00029964	-2.33726	5.56e-07	7.79e-06
SMil_00029994	-6.75795	1.19e-05	0.000123609
SMil_00030006	-4.84509	0.010572	0.0437392
SMil_00030012	-3.05449	2.58e-18	2.03e-16	Q9S9P3.1	Factor of DNA methylation 1
SMil_00030038	-4.31294	1.96e-13	8.52e-12	Q9FYE5.1	Probable sugar phosphate/phosphate translocator At5g04160
SMil_00030046	-4.06537	4.84e-06	5.54e-05
SMil_00030047	-3.77074	7.69e-06	8.43e-05
SMil_00030063	3.24462	0.00037013	0.00260024	O81832.4	G-type lectin S-receptor-like serine/threonine-protein kinase At4g27290
SMil_00030092	7.87716	5.88e-25	8.7e-23
SMil_00030106	-3.1864	2.51e-08	4.59e-07	Q93WN0.1	Selenium-binding protein 2
SMil_00030118	-4.19411	4.49e-05	0.000407273
SMil_00030145	3.89762	0.000137528	0.00109555
SMil_00030212	-3.91135	0.000107903	0.000884098
SMil_00030217	-4.5559	9.55e-10	2.27e-08	P81898.2	Peptide-N4-(N-acetyl-beta-glucosaminyl)asparagine amidase A; Short=PNGase A
SMil_00030247	-6.90209	5.77e-19	4.89e-17
SMil_00030294	2.15755	0.000592601	0.00391416
SMil_00030304	3.4101	3.65e-07	5.32e-06
SMil_00030311	-2.75575	0.00782917	0.0343172
SMil_00030323	-5.01916	0.00579164	0.027004	O81971.1	Cytochrome P450 71D9
SMil_00030329	6.17921	0.000156755	0.00122667
SMil_00030337	-3.8512	0.00135305	0.00790098
SMil_00030361	-3.72963	5.6e-08	9.5e-07	Q6L3X3.1	Putative late blight resistance protein homolog R1B-8
SMil_00030407	-2.46214	6.05e-21	6.37e-19	Q8W245.2	Probable zinc transporter 10
SMil_00030425	-5.18745	1.67e-07	2.58e-06
SMil_00030447	6.61994	1.17e-05	0.00012179	Q96473.1	V-type proton ATPase 16 kDa proteolipid subunit; Short=V-ATPase 16 kDa proteolipid subunit
SMil_00030450	-2.27076	5.95e-25	8.74e-23	Q56WD9.2	3-ketoacyl-CoA thiolase 2, peroxisomal
SMil_00017998	3.8821	0.0114219	0.0466033	Q9ZP56.1	PUTATIVE PSEUDOGENE
SMil_00018313	-2.3774	7.96e-08	1.3e-06	Q6L439.2	PUTATIVE PSEUDOGENE
SMil_00001563	-3.09857	3.23e-08	5.78e-07	XM_025972735.1	exocyst complex component EXO70B1
SMil_00023345	2.49968	2.39e-20	2.41e-18	XM_020695751.1	MADS-box protein SVP [Sesamum indicum]
SMil_00017239	2.34221	1.07e-06	1.42e-05	KU698902.1	putative LOV domain-containing protein [Salvia sp.]
SMil_00016066	4.98964	0.00087367	0.00544732	Q6L439.2	PUTATIVE PSEUDOGENE
SMil_00013709	-2.07946	0.00493837	0.023649	XM_020692191.1	rho guanine nucleotide exchange factor 8-like [Sesamum indicum]
SMil_00003209	-2.14285	6.25e-10	1.53e-08	O81193.1	(+)-sabinene synthase, chloroplastic
SMil_00000370	-7.70786	6.83e-46	3.85e-43	XM_011090959.2	110 kDa U5 small nuclear ribonucleoprotein component CLO
SMil_00013846	-6.98917	4.34e-07	6.19e-06	P93342.1	14-3-3-like protein A
SMil_00003504	-4.29902	3.68e-05	0.000340514	Q9SYG1.1	17.4 kDa class III heat shock protein
SMil_00017576	3.00939	7.06e-10	1.72e-08	P30693.1	17.6 kDa class I heat shock protein
SMil_00028924	6.43796	2.57e-11	7.84e-10	P30693.1	17.6 kDa class I heat shock protein
SMil_00013688	-2.78381	0.00156485	0.00894501	Q06588.2	1-aminocyclopropane-1-carboxylate oxidase 4
SMil_00026896	-4.03686	3.74e-05	0.000345609	Q0WPW4.1	1-aminocyclopropane-1-carboxylate oxidase 5
SMil_00016062	-2.5703	6.81e-06	7.54e-05	P93824.1	1-aminocyclopropane-1-carboxylate oxidase homolog 6
SMil_00015366	-2.13476	1e-06	1.34e-05	Q42908.1	2,3-bisphosphoglycerate-independent phosphoglycerate mutase
SMil_00004270	4.7866	1.47e-66	2.05e-63	Q9LP45.1	26S proteasome non-ATPase regulatory subunit 11 homolog
SMil_00018640	-2.18953	6.96e-05	0.000600241	Q8GYA6.1	26S proteasome non-ATPase regulatory subunit 13 homolog B
SMil_00002258	-2.64641	3.45e-23	4.4e-21	Q54JE4.1	2-oxoglutarate dehydroge-se, mitochondrial
SMil_00017976	-2.13062	3.42e-13	1.42e-11	PF01612	3'-5' exonuclease
SMil_00019924	-2.89459	1.42e-13	6.3e-12	Q6DJI4.1	39S ribosomal protein L41-A, mitochondrial
SMil_00019984	4.16235	0.00826462	0.0358288	O48780.1	3-ketoacyl-CoA synthase 11
SMil_00013973	-3.13713	0.00128051	0.00754664	Q9FG87.1	3-ketoacyl-CoA synthase 20
SMil_00020511	2.70832	1.07e-09	2.52e-08	Q945U1.1	40S ribosomal protein S15
SMil_00012882	-7.10673	7.22e-113	3.52e-109	P34788.1	40S ribosomal protein S18
SMil_00011923	-7.9851	5.93e-10	1.46e-08	Q9STY6.1	40S ribosomal protein S20-2
SMil_00012884	2.93968	7.1e-14	3.33e-12	Q9SS17.1	40S ribosomal protein S24-1
SMil_00004727	-9.63915	3.7e-15	2.03e-13	Q9M2F1.2	40S ribosomal protein S27-2
SMil_00019388	-2.02959	1.15e-20	1.18e-18	P46302.1	40S ribosomal protein S28
SMil_00001413	-2.1163	7.98e-11	2.27e-09	Q8L9A0.1	50S ribosomal protein L21, mitochondrial
SMil_00008182	-8.09381	7.63e-07	1.05e-05	Q9FQ04.1	5'-3' exoribonuclease 4
SMil_00005135	-2.37618	0.000742992	0.00474785	Q75K12.1	5'-nucleotidase domain-containing protein DDB_G0275467
SMil_00013428	-2.86757	4.65e-25	6.97e-23	P50346.1	60S acidic ribosomal protein P0
SMil_00019173	-3.25354	4.83e-22	5.66e-20	Q9ATF5.1	60S ribosomal protein L18a
SMil_00005966	3.18807	0.0026177	0.0138992	O22644.1	60S ribosomal protein L23A
SMil_00027533	8.45545	1.43e-11	4.56e-10	P41098.1	60S ribosomal protein L34
SMil_00002587	-8.96374	7.45e-13	2.92e-11	Q9M5L0.1	60S ribosomal protein L35
SMil_00012588	-6.18728	6.05e-05	0.000529288	Q6UNT2.1	60S ribosomal protein L5
SMil_00015814	4.0676	2.82e-32	7.3e-30	U3U992.1	7-deoxyloganetic acid glucosyltransferase
SMil_00006028	3.74454	0.000520715	0.00350259	F4IJ77.1	AAA-ATPase At2g46620
SMil_00017607	-2.99692	2.87e-08	5.19e-07	Q8LGU1.3	ABC transporter C family member 8
SMil_00023604	2.17662	0.00046081	0.00315327	Q9M1C7.2	ABC transporter C family member 9
SMil_00001946	-4.34528	6.16e-13	2.45e-11	Q9LES3.1	ABSCISIC ACID-INSENSITIVE 5-like protein 2
SMil_00003231	4.02352	8.05e-10	1.94e-08	P09342.1	Acetolactate synthase 1, chloroplastic
SMil_00008327	-8.73612	0.000101444	0.000838454	P29001.1	Acid beta-fructofuranosidase
SMil_00027753	-5.75539	5.59e-07	7.82e-06	P0CJ46.1	Actin-1
SMil_00025873	-2.84885	1.32e-10	3.61e-09	P25083.1	ADP,ATP carrier protein, mitochondrial
SMil_00027050	5.83548	1.73e-21	1.92e-19	O82743.1	Agamous-like MADS-box protein AGL19
SMil_00006193	-4.15826	5.23e-05	0.000466137	Q9SZJ6.1	Agamous-like MADS-box protein AGL21
SMil_00002564	-5.08177	0.00146031	0.00843311	XM_011088982.2	agamous-like MADS-box protein AGL65
SMil_00029732	-2.4298	3.87e-07	5.61e-06	PF05641	Agenet domain
SMil_00029299	-4.83593	4.12e-07	5.92e-06	PF07468	Agglutinin domain
SMil_00024989	-2.45457	2.57e-06	3.11e-05	Q9SLK2.1	ALA-interacting subunit 3
SMil_00005927	2.3815	3.79e-30	8.34e-28	P14675.1	Alcohol dehydroge-se 3
SMil_00013050	2.21043	3.25e-09	7.04e-08	P23901.1	Aldose reductase
SMil_00016938	-3.4936	1.39e-11	4.46e-10	PF12695	Alpha/beta hydrolase family
SMil_00023253	-2.42626	0.00185922	0.0103645	P37462.2	Alpha-ketoglutarate-dependent dioxyge-se AlkB
SMil_00016904	2.47519	3.65e-06	4.3e-05	Q9SJE8.2	Aluminum-activated malate transporter 2
SMil_00005422	-2.4229	3.08e-05	0.000290828	P92934.1	Amino acid permease 6
SMil_00010412	-3.66826	0.000902283	0.00559473	Q9SQK3.1	Ankyrin repeat domain-containing protein EMB506, chloroplastic
SMil_00022386	-2.031	3.14e-10	8.11e-09	Q9C7A2.1	Ankyrin repeat-containing protein ITN1
SMil_00021028	2.63761	3.25e-07	4.8e-06	Q5YGP7.1	AP2-like ethylene-responsive transcription factor PLT2
SMil_00018382	7.96127	1.38e-09	3.17e-08	Q9STS3.1	A-phase-promoting complex subunit 8
SMil_00025534	-3.30522	1.83e-11	5.7e-10	Q9SSE7.1	Aroge-te dehydratase/prephe-te dehydratase 2, chloroplastic
[truncated: 573 more rows]
