# Supplementary material for: Comparative transcriptome analysis reveals key insights into male sterility in Salvia miltiorrhiza Bunge
Source: PeerJ. 2021 Apr 27;9:e11326. doi: 10.7717/peerj.11326 (PMC8086568; doi:10.7717/peerj.11326)
Supplement: Supplemental Information 3 [file peerj-09-11326-s003.xlsx]

## Sheet: Sheet1
Table S3 The top enriched 20 GO terms
GO_acc	term_type	Term	queryitem	GeneRatio （1765）	bgitem	BgRatio (25893)	pvalue	FDR	UP	DOWN
GO:0009932	P	cell tip growth	16	0.00906516	74	0.00285792	0.00017	0.57	5	11
GO:0048588	P	developmental cell growth	15	0.00849858	84	0.00324412	0.0015	0.97	3	12
GO:0048589	P	developmental growth	33	0.0186969	265	0.0102344	0.0015	0.97	8	25
GO:0009718	P	anthocyanin biosynthetic process	9	0.00509915	35	0.00135172	0.0016	0.97	2	7
GO:0008361	P	regulation of cell size	36	0.0203966	306	0.0118179	0.0023	0.97	12	24
GO:0016049	P	cell growth	35	0.01983	295	0.011393	0.0023	0.97	12	23
GO:0022891	F	substrate-specific transmembrane transporter activity	83	0.0470255	872	0.0336771	0.0027	0.69	16	67
GO:0015075	F	ion transmembrane transporter activity	61	0.0345609	605	0.0233654	0.003	0.69	13	48
GO:0040007	P	growth	41	0.0232295	370	0.0142896	0.0032	1	14	27
GO:0022892	F	substrate-specific transporter activity	93	0.0526912	1007	0.0388908	0.0034	0.69	19	74
GO:0005351	F	sugar:hydrogen symporter activity	15	0.00849858	94	0.00363032	0.0039	0.69	3	12
GO:0008324	F	cation transmembrane transporter activity	46	0.0260623	436	0.0168385	0.0043	0.69	9	37
GO:0048610	P	reproductive cellular process	12	0.00679887	68	0.00262619	0.0047	1	3	9
GO:0015293	F	symporter activity	19	0.0107649	137	0.00529101	0.0051	0.69	5	14
GO:0009826	P	unidimensional cell growth	26	0.0147309	212	0.00818754	0.0053	1	8	18
GO:0022804	F	active transmembrane transporter activity	66	0.0373938	685	0.026455	0.0054	0.69	15	51
GO:0022857	F	transmembrane transporter activity	100	0.0566572	1123	0.0433708	0.0064	0.69	21	79
GO:0003779	F	actin binding	9	0.00509915	45	0.00173792	0.0067	0.69	2	7
GO:0009860	P	pollen tube growth	10	0.00566572	54	0.00208551	0.007	1	3	7
GO:0015291	F	secondary active transmembrane transporter activity	34	0.0192635	308	0.0118951	0.0071	0.69	7	27
