# Supplementary material for: Comparative transcriptome analysis reveals key insights into male sterility in Salvia miltiorrhiza Bunge
Source: PeerJ. 2021 Apr 27;9:e11326. doi: 10.7717/peerj.11326 (PMC8086568; doi:10.7717/peerj.11326)
Supplement: Supplemental Information 4 — Comparison of expression levels measured by RNA-Seq and qRT-PCR for selected 23 DEGs. [file peerj-09-11326-s004.xlsx]

## Sheet: Linear fitting results
														Real-time PCR	RNA-Seq			Gene ID	Real-time PCR			RNA-seq
														-1.95	-3.06993				SW-S	SW-F	log2FoldChange (SW-S/SW-F)	log2FoldChange (SW-S/SW-F)
														2.47	5.83548			SMil_00004290	1	3.86	-1.9486	-3.06993
														-3.22651	-6.53			SMil_00027050	1	0.18	2.47393	5.83548
														6.64386	6.93			SMil_00008667	0.25	2.34	-3.22651	-6.53
														4.64	5.69			SMil_00011521	1	0.01	6.64386	6.93
														-2.25154	-2.68918			SMil_00005944	1	0.04	4.64386	5.69
														-2.8365	-3.41			SMil_00019301	0.21	1	-2.25154	-2.68918
														-2.18442	-2.81144			SMil_00000951	0.14	1	-2.8365	-5.70827
														-3.47393	-3.41352			SMil_00004880	0.22	1	-2.18442	-2.81144
														-3.47393	-3.75053			SMil_00015887	0.09	1	-3.47393	-3.41352
														-2.73697	-7.14776			SMil_00000278	0.09	1	-3.47393	-3.75053
														-2.8365	-3.41			SMil_00007823	0.15	1	-2.73697	-7.14776
														-2.47393	-6.54			SMil_00003466	0.14	1	-2.8365	-3.41
														-2.64386	-2.04			SMil_00026949	0.18	1	-2.47393	-6.54
														-2.64386	-6.06			SMil_00001217	0.16	1	-2.64386	-2.04
														-3.64386	-3.5			SMil_00029050	0.16	1	-2.64386	-6.06
														-1.39593	-3.52			SMil_00016982	0.08	1	-3.64386	-3.5
														-2.55639	-2.68			SMil_00003163	0.38	1	-1.39593	-3.52
														-2.94342	-2.47			SMil_00023235	0.17	1	-2.55639	-2.68
														-3.05889	-3.02			SMil_00011892	0.13	1	-2.94342	-2.47
														-3.18442	-6.27			SMil_00005152	0.12	1	-3.05889	-3.02
														-3.35107	-2.3			SMil_00025076	0.11	1	-3.18442	-6.27
														-3.47393	-3.66			SMil_00017238	0.098	1	-3.35107	-2.3
																		SMil_00022477	0.09	1	-3.47393	-3.66
