# Supplementary material for: Comparative transcriptome analysis reveals key insights into male sterility in Salvia miltiorrhiza Bunge
Source: PeerJ. 2021 Apr 27;9:e11326. doi: 10.7717/peerj.11326 (PMC8086568; doi:10.7717/peerj.11326)
Supplement: Supplemental Information 5 — DEGs related to microgametogenesis and developmental maturation. [file peerj-09-11326-s005.xlsx]

## Sheet: Histogram of gene expression
	microgametogenesis										developmental maturation
	qRT-PCR	RNA-seq	SEM								qRT-PCR	RNA-seq	SEM
SMil_00019301	-2.25154	-2.68918	0.15							SMil_00001217	-2.64386	-2.04	0.49
SMil_00000951	-2.8365	-5.70827	0.38							SMil_00029050	-2.64386	-6.06	0.36
SMil_00004880	-2.18442	-2.81144	0.07							SMil_00016982	-3.64386	-3.5	0.42
SMil_00015887	-3.47393	-3.41352	0.13							SMil_00003163	-1.39593	-3.52	0.12
SMil_00000278	-3.47393	-3.75053	0.17							SMil_00023235	-2.55639	-2.68	0.21
SMil_00007823	-2.73697	-7.14776	0.87							SMil_00011892	-2.94342	-2.47	0.2
SMil_00003466	-2.8365	-3.41	0.14							SMil_00005152	-3.05889	-3.02	0.18
SMil_00026949	-2.47393	-6.54	0.29							SMil_00025076	-3.18442	-6.27	0.26
										SMil_00017238	-3.35107	-2.3	0.52
										SMil_00022477	-3.47393	-3.66	0.17
